# Supplementary material for: Physicians’ Experience with COVID-19 Vaccination: A Survey Study
Source: MDPI journal article supplement (doi:10.3390/healthcare9121746), 2021-12-17
Supplement: s1 [file s1]

## Q1 Sunteți medic?

Answered: 509 Skipped: 0

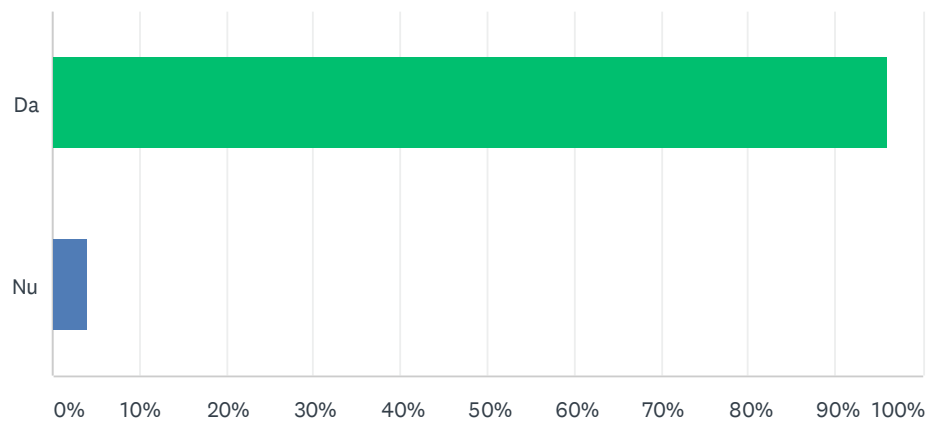

| ANSWER CHOICES | RESPONSES |     |
|----------------|-----------|-----|
| Da             | 96.07%    | 489 |
| Nu             | 3.93%     | 20  |
| TOTAL          |           | 509 |

## Q2 Lucrați în România?

Answered: 488 Skipped: 21

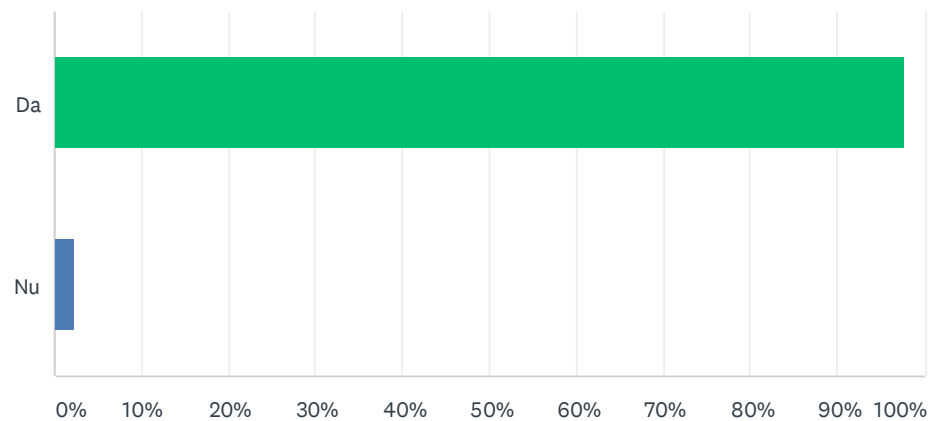

| ANSWER CHOICES | RESPONSES |     |
|----------------|-----------|-----|
| Da             | 97.75%    | 477 |
| Nu             | 2.25%     | 11  |
| TOTAL          |           | 488 |

## Q3 Varsta dumneavoastra este:

Answered: 467 Skipped: 42

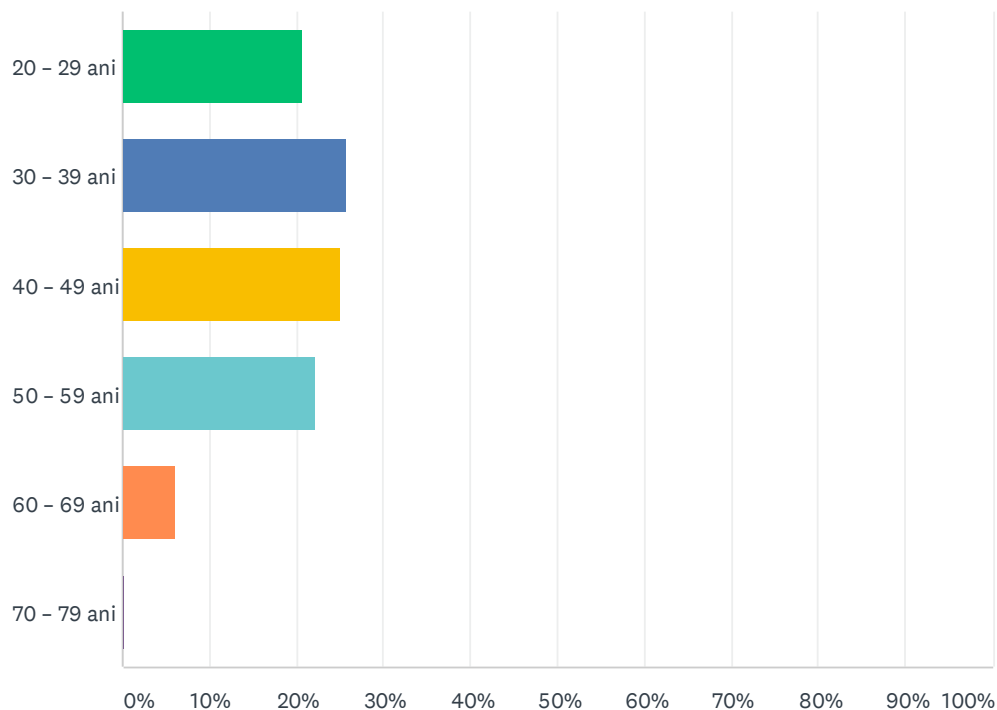

| ANSWER CHOICES | RESPONSES |     |
|----------------|-----------|-----|
| 20 – 29 ani    | 20.77%    | 97  |
| 30 – 39 ani    | 25.70%    | 120 |
| 40 – 49 ani    | 25.05%    | 117 |
| 50 – 59 ani    | 22.27%    | 104 |
| 60 – 69 ani    | 6.00%     | 28  |
| 70 – 79 ani    | 0.21%     | 1   |
| TOTAL          |           | 467 |

## Q4 Care este sexul dumneavoastra?

Answered: 467 Skipped: 42

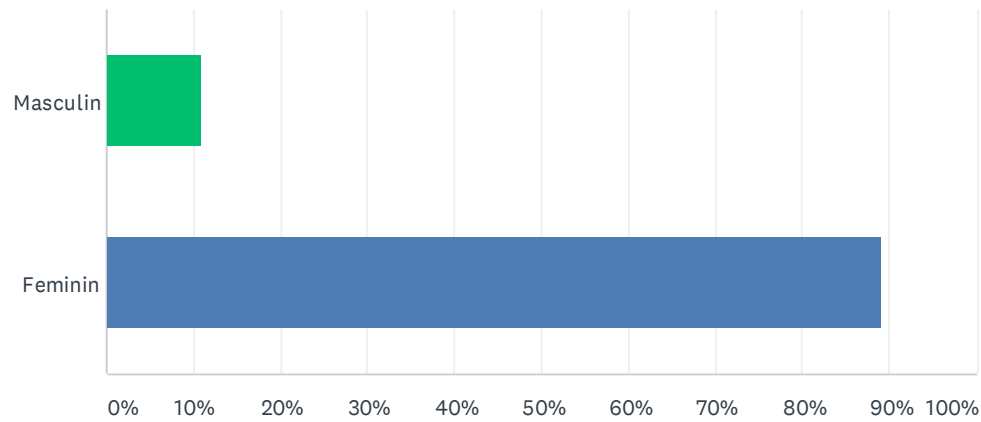

| ANSWER CHOICES | RESPONSES |     |
|----------------|-----------|-----|
| Masculin       | 10.92%    | 51  |
| Feminin        | 89.08%    | 416 |
| TOTAL          |           | 467 |

## Q5 Care este specialitatea in care activati?

Answered: 467 Skipped: 42

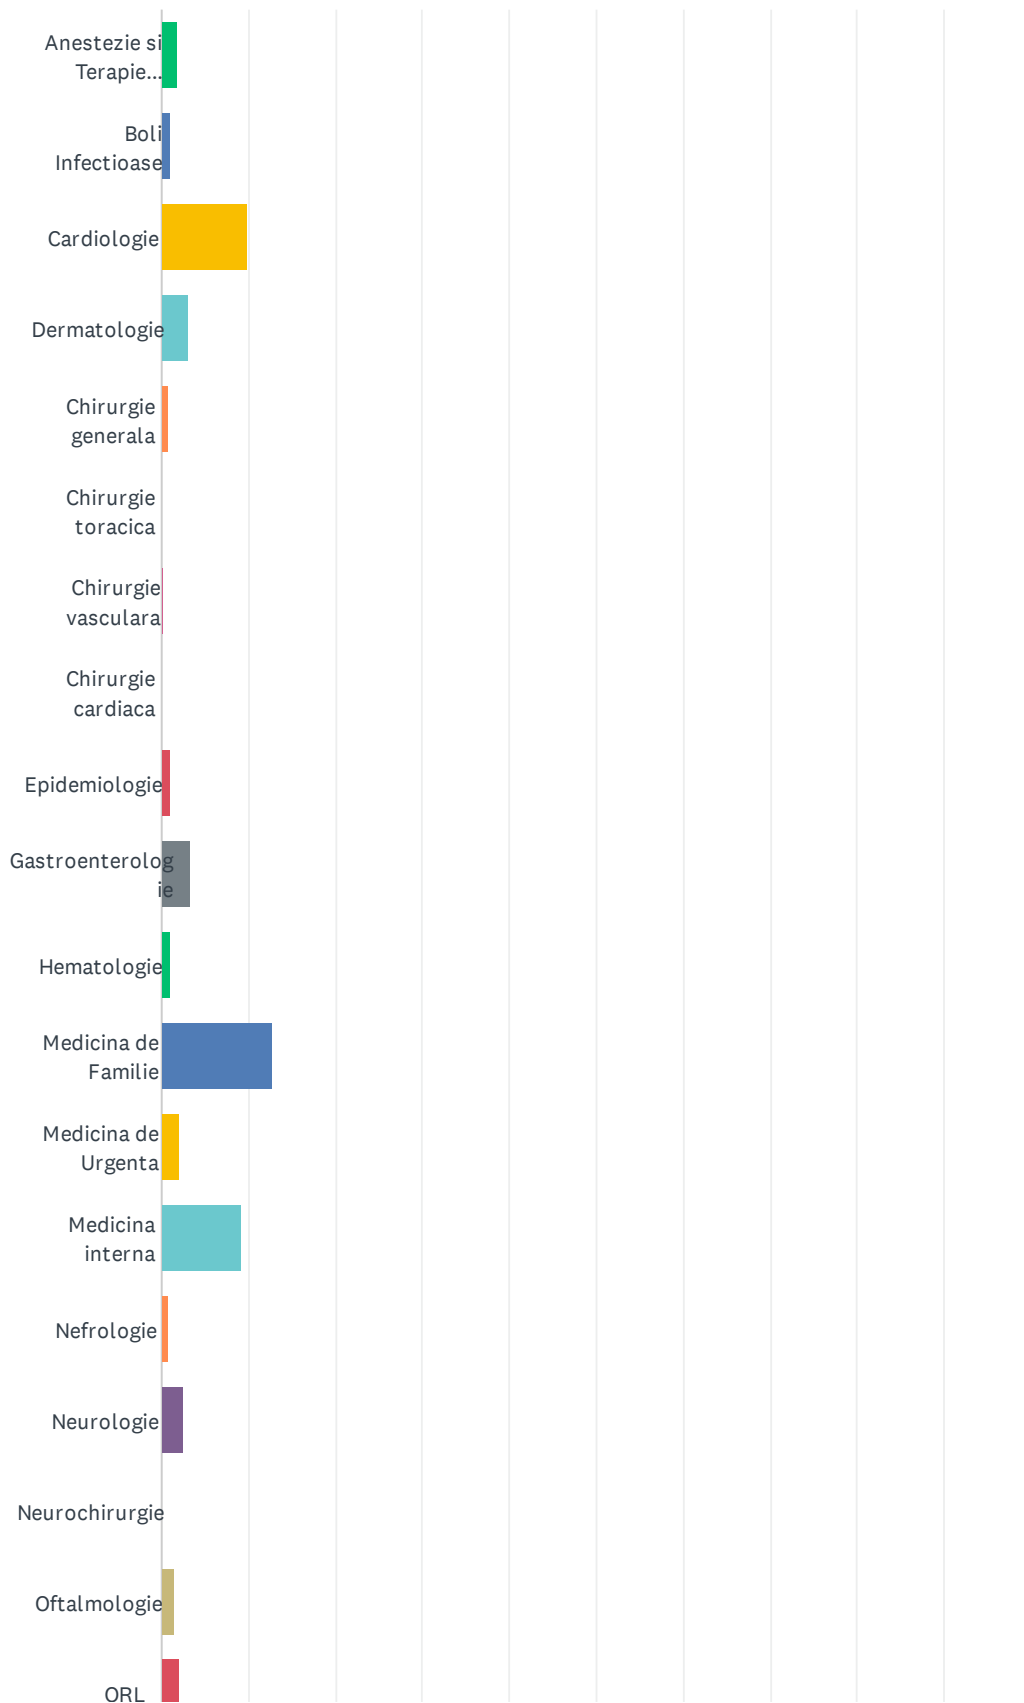

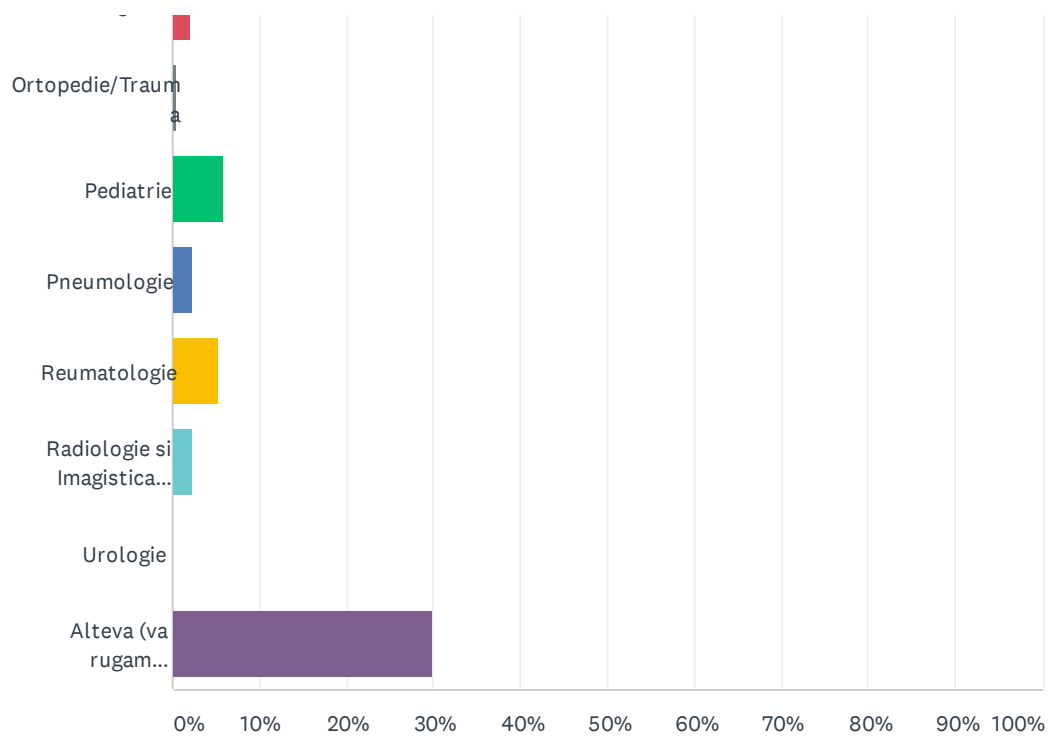

| ANSWER CHOICES                    | RESPONSES |     |
|-----------------------------------|-----------|-----|
| Anestezie si Terapie Intensiva    | 1.93%     | 9   |
| Boli Infectioase                  | 1.07%     | 5   |
| Cardiologie                       | 9.85%     | 46  |
| Dermatologie                      | 3.21%     | 15  |
| Chirurgie generala                | 0.86%     | 4   |
| Chirurgie toracica                | 0.00%     | 0   |
| Chirurgie vasculara               | 0.21%     | 1   |
| Chirurgie cardiaca                | 0.00%     | 0   |
| Epidemiologie                     | 1.07%     | 5   |
| Gastroenterologie                 | 3.43%     | 16  |
| Hematologie                       | 1.07%     | 5   |
| Medicina de Familie               | 12.85%    | 60  |
| Medicina de Urgenta               | 2.14%     | 10  |
| Medicina interna                  | 9.21%     | 43  |
| Nefrologie                        | 0.86%     | 4   |
| Neurologie                        | 2.57%     | 12  |
| Neurochirurgie                    | 0.00%     | 0   |
| Oftalmologie                      | 1.50%     | 7   |
| ORL                               | 2.14%     | 10  |
| Ortopedie/Trauma                  | 0.43%     | 2   |
| Pediatric                         | 5.78%     | 27  |
| Pneumologie                       | 2.36%     | 11  |
| Reumatologie                      | 5.14%     | 24  |
| Radiologie si Imagistica Medicala | 2.36%     | 11  |
| Urologie                          | 0.00%     | 0   |
| Alteva (va rugam mentionati)      | 29.98%    | 140 |
| TOTAL                             |           | 467 |

## Q6 Care este nivelul dumneavoastra de experienta?

Answered: 466 Skipped: 43

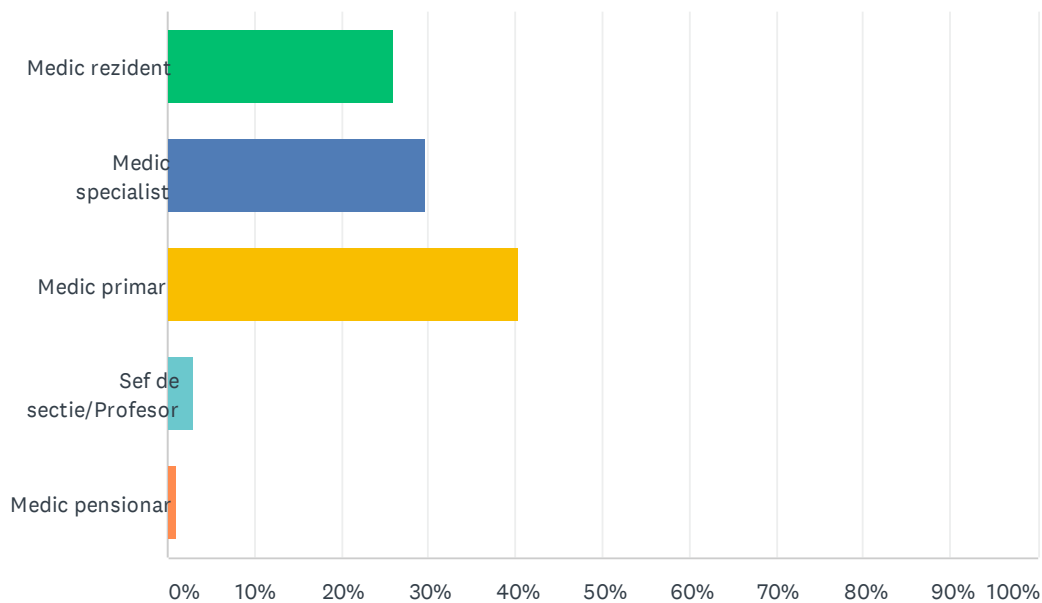

| ANSWER CHOICES         | RESPONSES |     |
|------------------------|-----------|-----|
| Medic rezident         | 25.97%    | 121 |
| Medic specialist       | 29.61%    | 138 |
| Medic primar           | 40.34%    | 188 |
| Sef de sectie/Profesor | 3.00%     | 14  |
| Medic pensionar        | 1.07%     | 5   |
| TOTAL                  |           | 466 |



## Q7 Va rugam sa precizati cu care dintre urmatoarele comorbiditati ati fost diagnosticat/a: (raspuns multiplu posibil)

Answered: 466 Skipped: 43

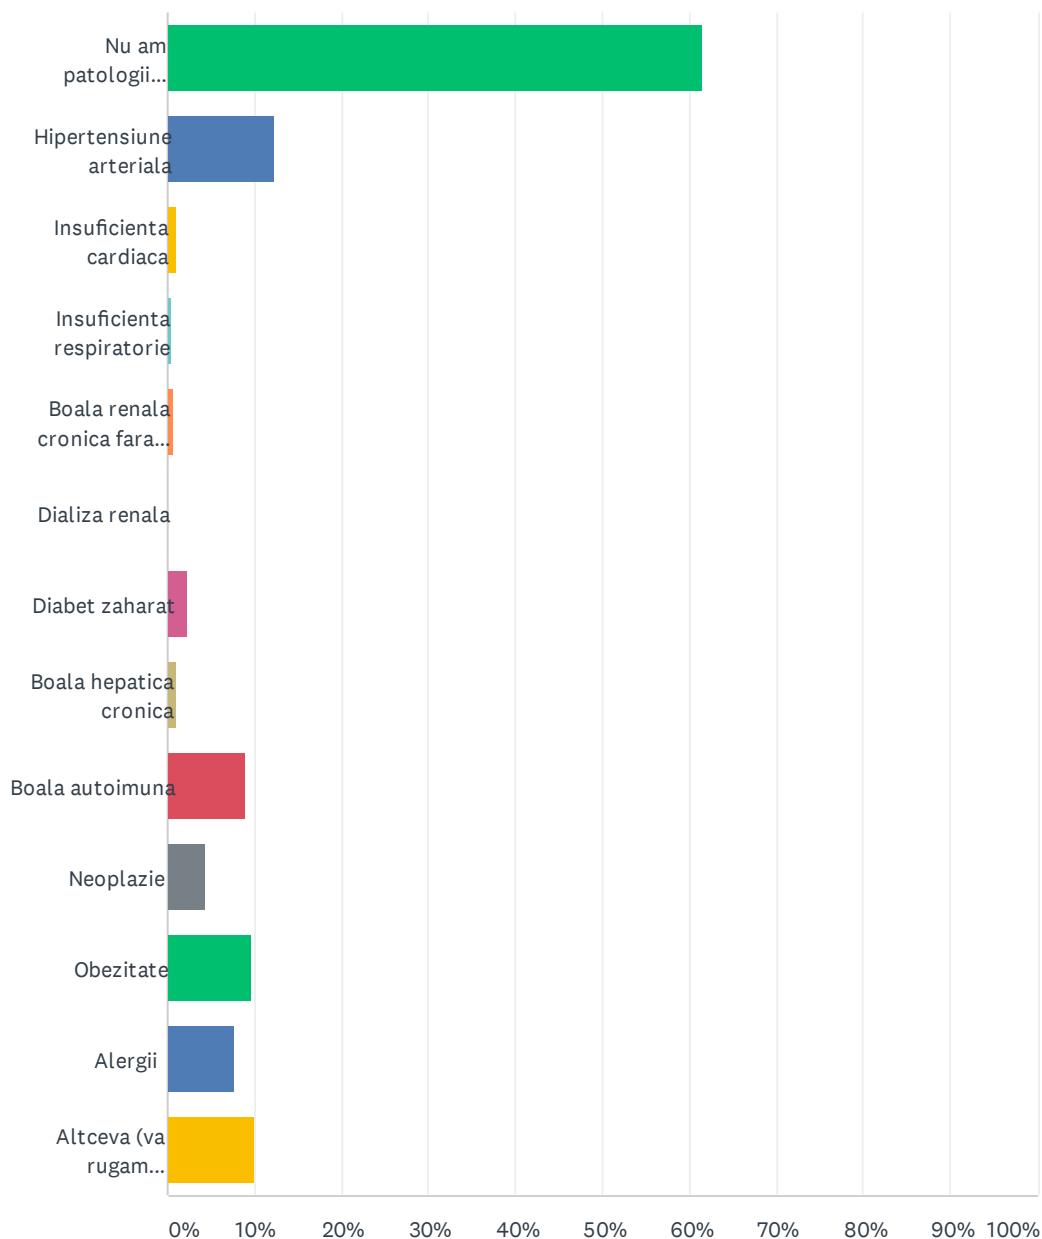

| ANSWER CHOICES                              | RESPONSES |     |
|---------------------------------------------|-----------|-----|
| Nu am patologii semnificative diagnosticate | 61.59%    | 287 |
| Hipertensiune arteriala                     | 12.45%    | 58  |
| Insuficienta cardiaca                       | 1.07%     | 5   |
| Insuficienta respiratorie                   | 0.43%     | 2   |
| Boala renala cronica fara dializa           | 0.64%     | 3   |
| Dializa renala                              | 0.00%     | 0   |
| Diabet zaharat                              | 2.36%     | 11  |
| Boala hepatica cronica                      | 1.07%     | 5   |
| Boala autoimuna                             | 9.01%     | 42  |
| Neoplazie                                   | 4.29%     | 20  |
| Obezitate                                   | 9.66%     | 45  |
| Alergii                                     | 7.73%     | 36  |
| Altceva (va rugam precizati)                | 10.09%    | 47  |
| Total Respondents: 466                      |           |     |

## Q8 Vi s-a administrat vaccinul anti-COVID-19?

Answered: 467 Skipped: 42

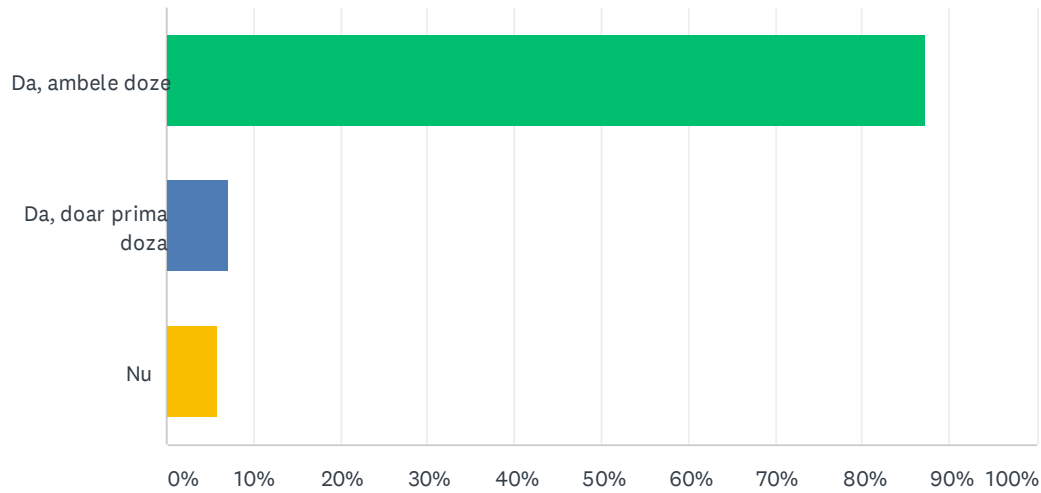

| ANSWER CHOICES      | RESPONSES |     |
|---------------------|-----------|-----|
| Da, ambele doze     | 87.15%    | 407 |
| Da, doar prima doza | 7.07%     | 33  |
| Nu                  | 5.78%     | 27  |
| TOTAL               |           | 467 |

## Q9 Daca NU v-ati vaccinat impotriva COVID-19, care este motivul?

Answered: 24 Skipped: 485

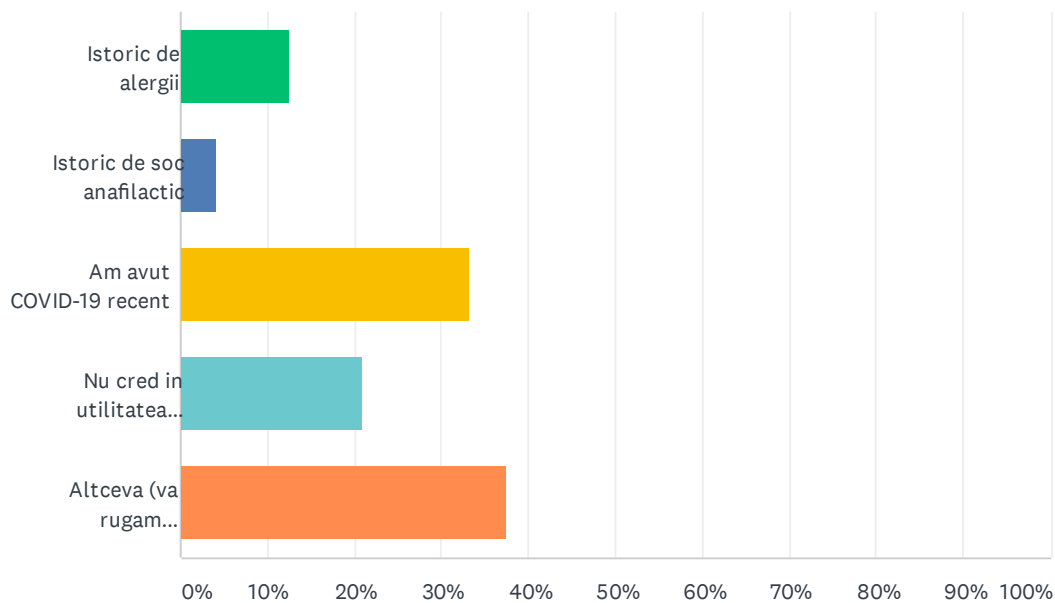

| ANSWER CHOICES                   | RESPONSES |   |
|----------------------------------|-----------|---|
| Istoric de alergii               | 12.50%    | 3 |
| Istoric de soc anafilactic       | 4.17%     | 1 |
| Am avut COVID-19 recent          | 33.33%    | 8 |
| Nu cred in utilitatea vaccinului | 20.83%    | 5 |
| Altceva (va rugam precizati)     | 37.50%    | 9 |
| Total Respondents: 24            |           |   |

## Q10 Cu ce vaccin anti-COVID-19 ati fost vaccinat/a?

Answered: 420 Skipped: 89

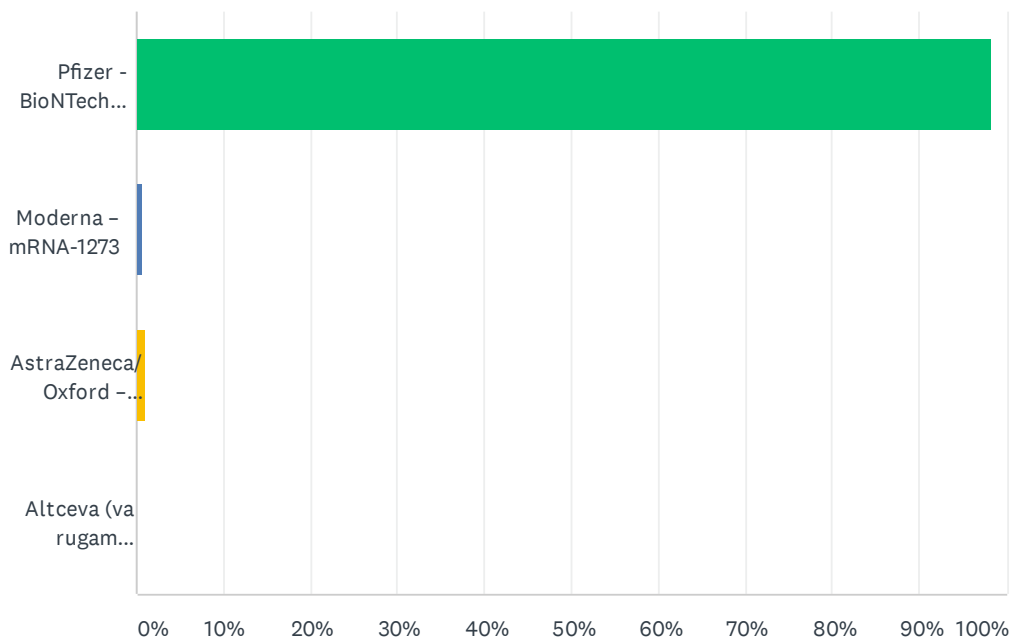

| ANSWER CHOICES                           | RESPONSES |     |
|------------------------------------------|-----------|-----|
| Pfizer - BioNTech (Comirnaty) - BNT162b2 | 98.33%    | 413 |
| Moderna – mRNA-1273                      | 0.71%     | 3   |
| AstraZeneca/ Oxford – AZD1222            | 0.95%     | 4   |
| Altceva (va rugam precizati)             | 0.00%     | 0   |
| TOTAL                                    |           | 420 |

# Q11 Cand ati fost vaccinat/a impotriva COVID-19 (prima doza)?

Answered: 420 Skipped: 89

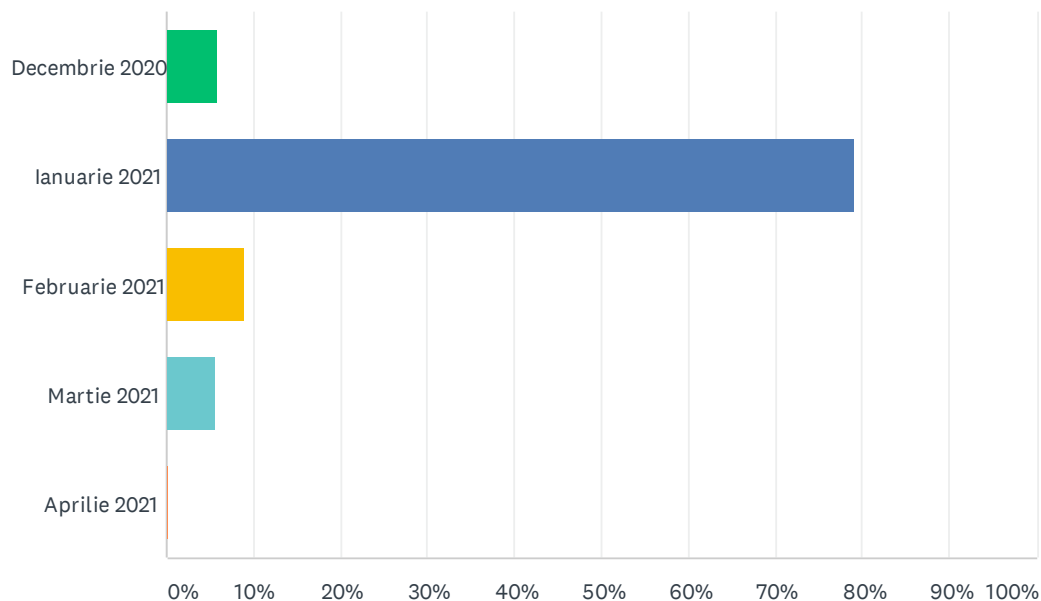

| ANSWER CHOICES | RESPONSES |     |
|----------------|-----------|-----|
| Decembrie 2020 | 5.95%     | 25  |
| Ianuarie 2021  | 79.05%    | 332 |
| Februarie 2021 | 9.05%     | 38  |
| Martie 2021    | 5.71%     | 24  |
| Aprilie 2021   | 0.24%     | 1   |
| TOTAL          |           | 420 |

**Q12 Inainte de administrarea vaccinului anti-COVID-19 +/- inaintea aparitiei oricarei reactii adverse, ati luat vreun tratament pentru a preveni eventualele reactii adverse secundare vaccinarii? (raspuns multiplu posibil)**

Answered: 420 Skipped: 89

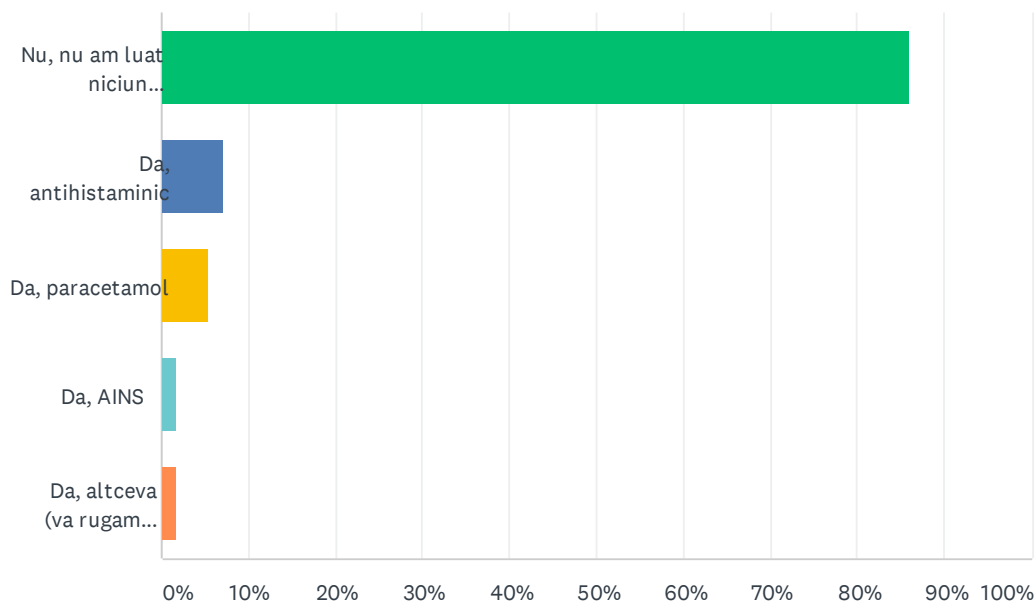

| ANSWER CHOICES                   | RESPONSES |     |
|----------------------------------|-----------|-----|
| Nu, nu am luat niciun medicament | 85.95%    | 361 |
| Da, antihistaminic               | 7.14%     | 30  |
| Da, paracetamol                  | 5.48%     | 23  |
| Da, AINS                         | 1.67%     | 7   |
| Da, altceva (va rugam precizati) | 1.67%     | 7   |
| Total Respondents: 420           |           |     |

# Q13 Dupa administrarea primei doze a vaccinului anti-COVID-19 ce reactii adverse ati prezentat?(raspuns multiplu posibil)

Answered: 420 Skipped: 89

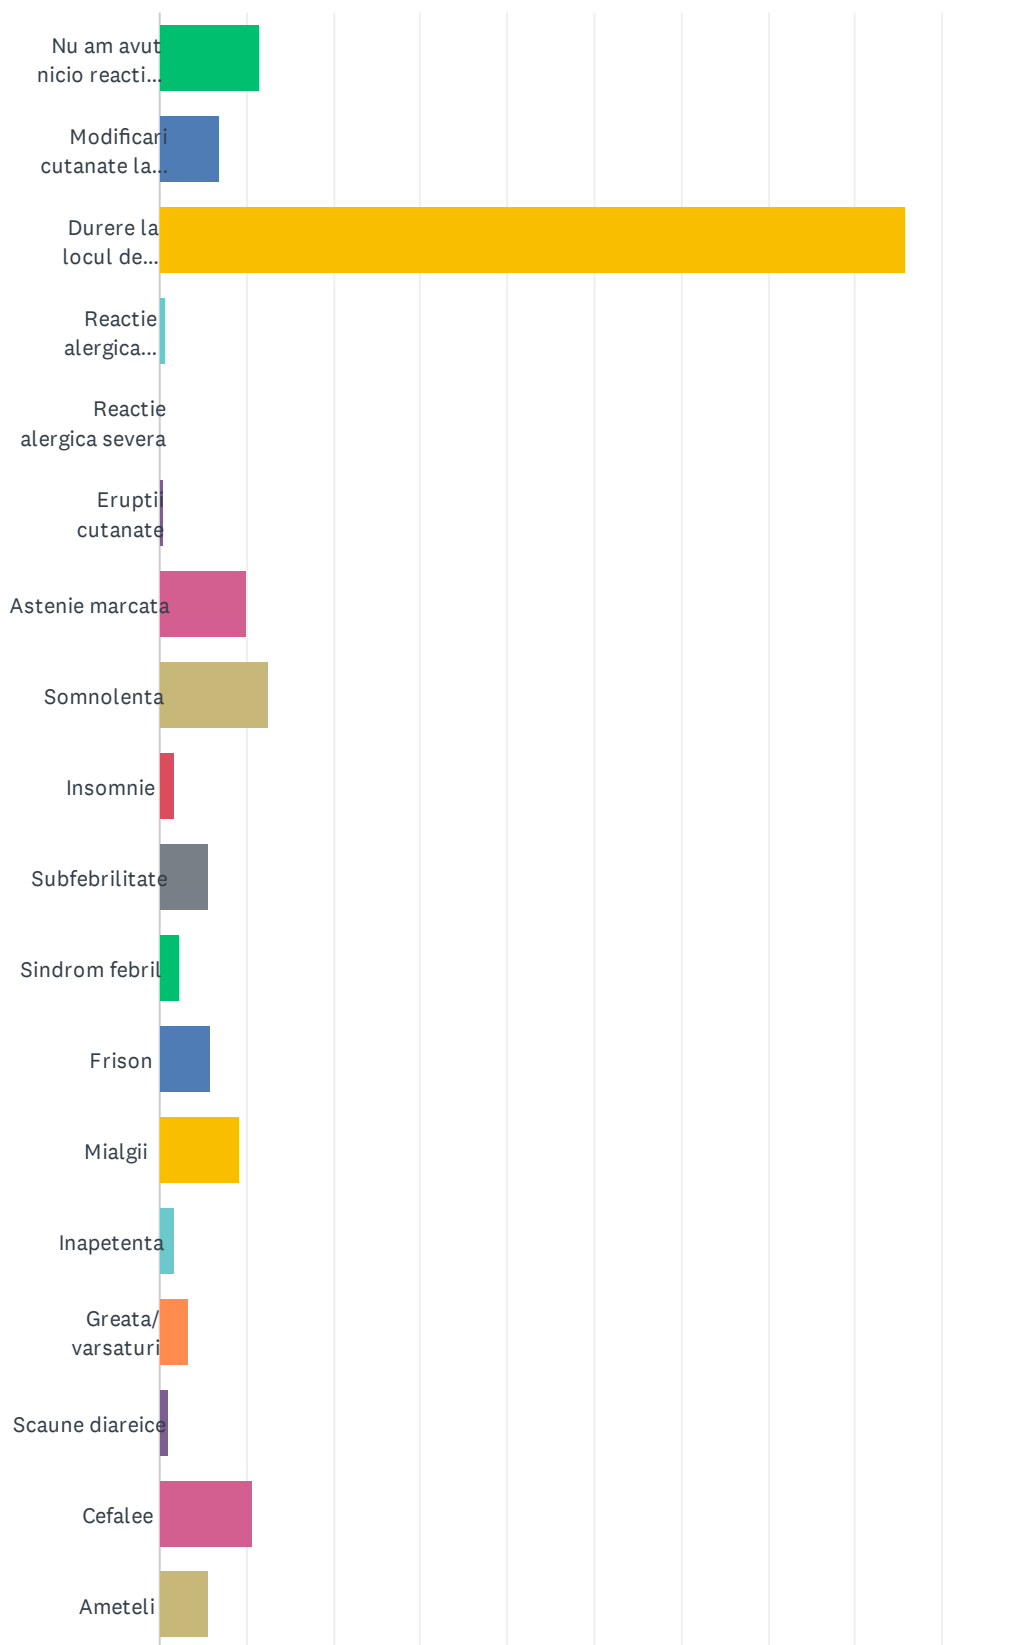



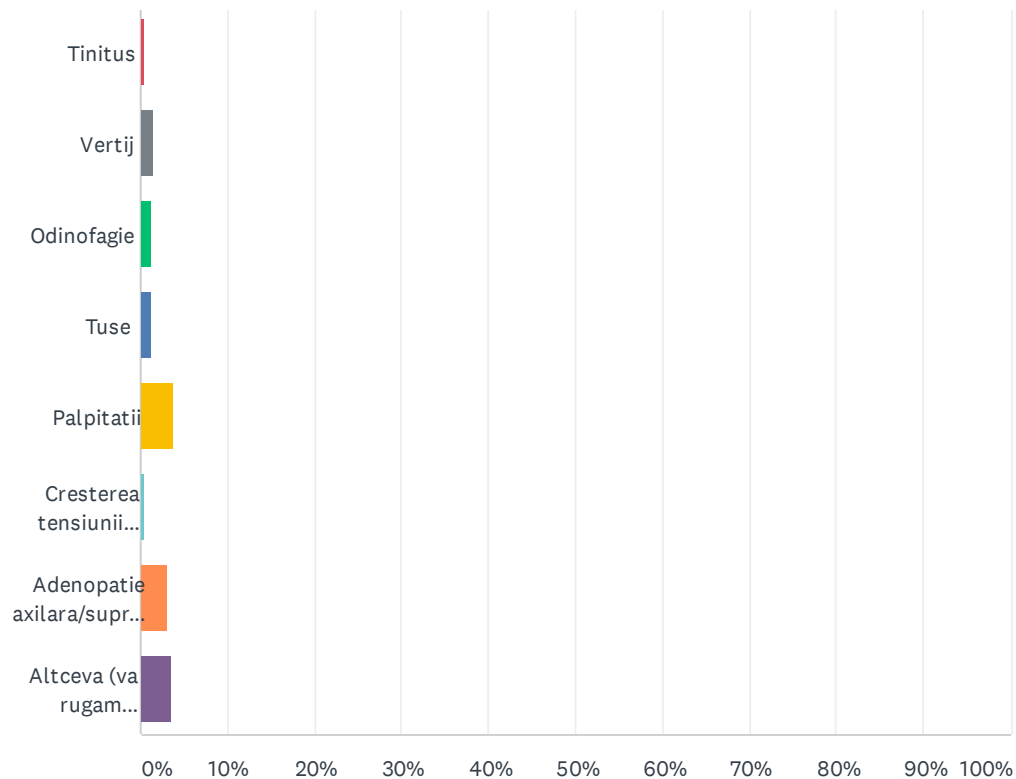

| ANSWER CHOICES                            | RESPONSES |     |
|-------------------------------------------|-----------|-----|
| Nu am avut nicio reactie adversa          | 11.43%    | 48  |
| Modificari cutanate la locul de injectare | 6.90%     | 29  |
| Durere la locul de injectare              | 85.71%    | 360 |
| Reactie alergica usoara-moderata          | 0.71%     | 3   |
| Reactie alergica severa                   | 0.00%     | 0   |
| Eruptii cutanate                          | 0.48%     | 2   |
| Astenie marcata                           | 10.00%    | 42  |
| Somnolenta                                | 12.62%    | 53  |
| Insomnie                                  | 1.67%     | 7   |
| Subfebrilitate                            | 5.71%     | 24  |
| Sindrom febril                            | 2.38%     | 10  |
| Frison                                    | 5.95%     | 25  |
| Mialgii                                   | 9.29%     | 39  |
| Inapetenta                                | 1.67%     | 7   |
| Greata/ varsaturi                         | 3.33%     | 14  |
| Scaune diareice                           | 0.95%     | 4   |
| Cefalee                                   | 10.71%    | 45  |
| Ameteli                                   | 5.71%     | 24  |
| Tinitus                                   | 0.48%     | 2   |
| Vertij                                    | 1.43%     | 6   |
| Odinofagie                                | 1.19%     | 5   |
| Tuse                                      | 1.19%     | 5   |
| Palpitatii                                | 3.81%     | 16  |
| Cresterea tensiunii arteriale             | 0.48%     | 2   |
| Adenopatie axilara/supraclaviculara       | 3.10%     | 13  |
| Altceva (va rugam precizati)              | 3.57%     | 15  |
| Total Respondents: 420                    |           |     |

## Q14 La ce interval dupa prima adminstrare a vaccinului anti-COVID-19 au aparut reactiile adverse atribuite acestuia?

Answered: 420 Skipped: 89

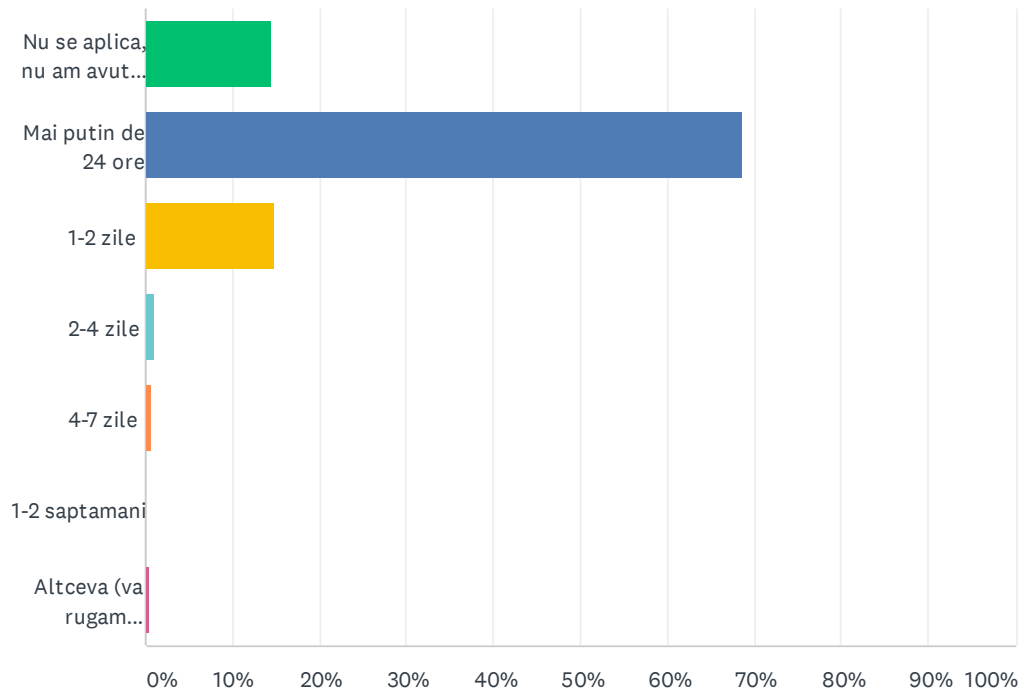

| ANSWER CHOICES                           | RESPONSES |     |
|------------------------------------------|-----------|-----|
| Nu se aplica, nu am avut reactii adverse | 14.52%    | 61  |
| Mai putin de 24 ore                      | 68.57%    | 288 |
| 1-2 zile                                 | 14.76%    | 62  |
| 2-4 zile                                 | 0.95%     | 4   |
| 4-7 zile                                 | 0.71%     | 3   |
| 1-2 saptamani                            | 0.00%     | 0   |
| Altceva (va rugam precizati)             | 0.48%     | 2   |
| TOTAL                                    |           | 420 |

## Q15 Ce medicamente ati luat ca tratament pentru a trata reactiile adverse aparute dupa prima administrare a vaccinului anti-COVID-19? (raspuns multiplu posibil)

Answered: 420 Skipped: 89

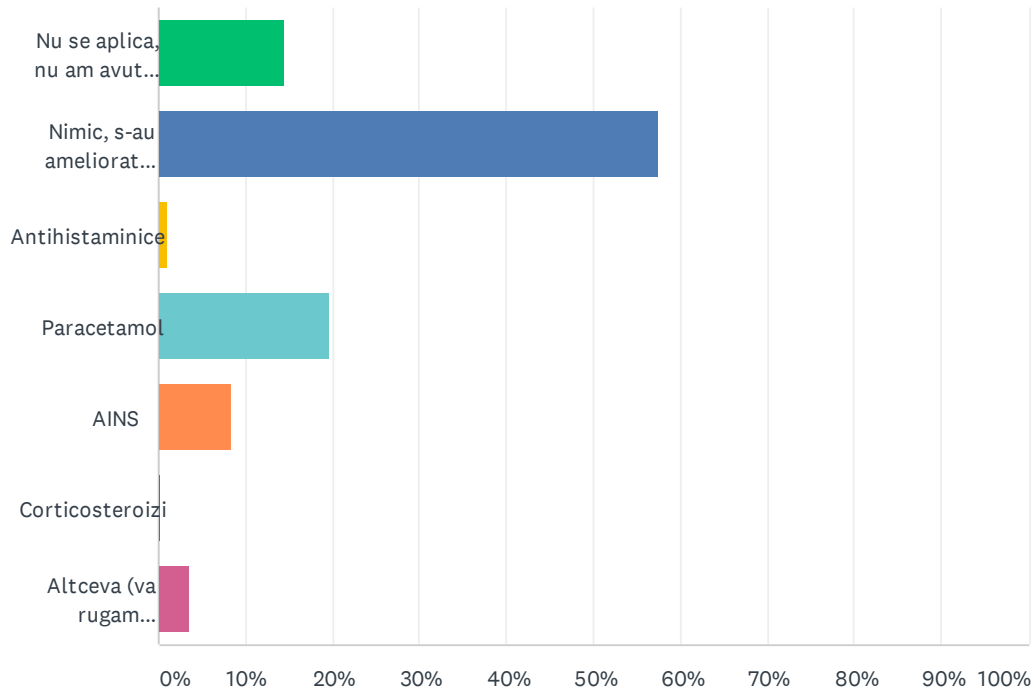

| ANSWER CHOICES                           | RESPONSES |     |
|------------------------------------------|-----------|-----|
| Nu se aplica, nu am avut reactii adverse | 14.52%    | 61  |
| Nimic, s-au ameliorat spontan            | 57.62%    | 242 |
| Antihistaminice                          | 0.95%     | 4   |
| Paracetamol                              | 19.76%    | 83  |
| AINS                                     | 8.33%     | 35  |
| Corticosteroizi                          | 0.24%     | 1   |
| Altceva (va rugam precizati)             | 3.57%     | 15  |
| Total Respondents: 420                   |           |     |

## Q16 Dupa administrarea celei de a 2-a doze a vaccinului anti-COVID-19 ce reactii adverse ati prezentat?(raspuns multiplu posibil)

Answered: 419 Skipped: 90

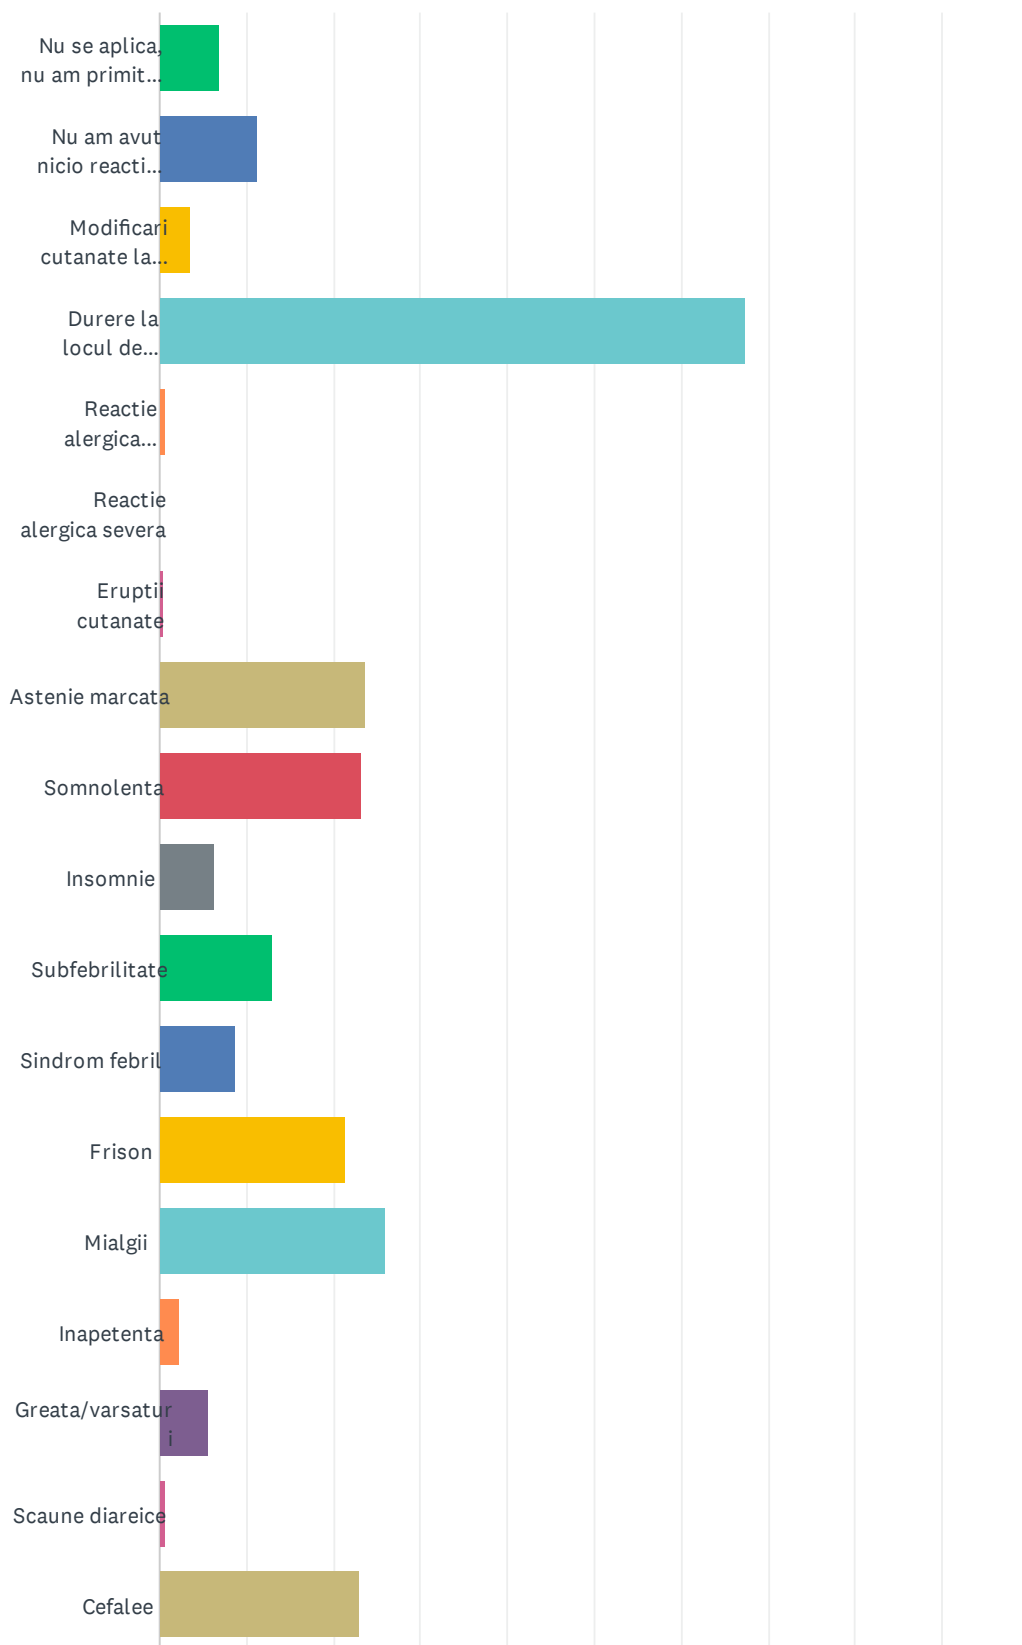

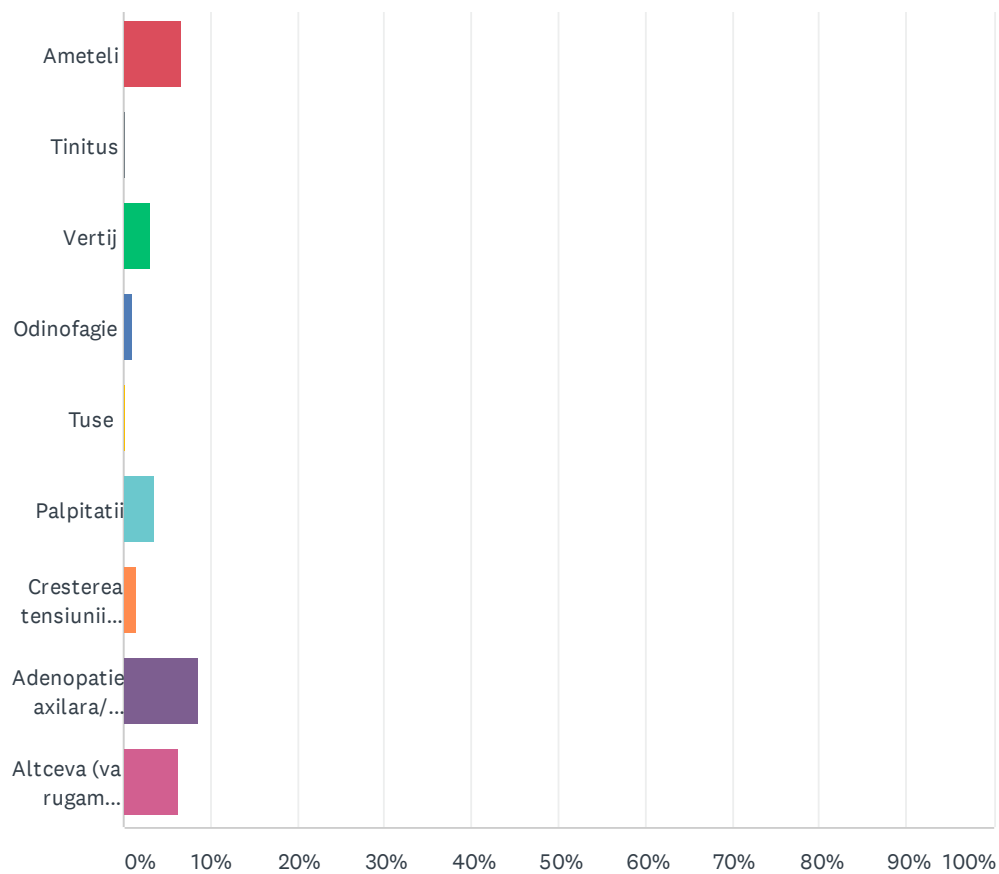

| ANSWER CHOICES                                           | RESPONSES |     |
|----------------------------------------------------------|-----------|-----|
| Nu se aplica, nu am primit inca a doua doza a vaccinului | 6.92%     | 29  |
| Nu am avut nicio reactie adversa                         | 11.22%    | 47  |
| Modificari cutanate la locul de injectare                | 3.58%     | 15  |
| Durere la locul de injectare                             | 67.30%    | 282 |
| Reactie alergica usoara-moderata                         | 0.72%     | 3   |
| Reactie alergica severa                                  | 0.00%     | 0   |
| Eruptii cutanate                                         | 0.48%     | 2   |
| Astenie marcata                                          | 23.63%    | 99  |
| Somnolenta                                               | 23.15%    | 97  |
| Insomnie                                                 | 6.21%     | 26  |
| Subfebrilitate                                           | 12.89%    | 54  |
| Sindrom febril                                           | 8.83%     | 37  |
| Frison                                                   | 21.24%    | 89  |
| Mialgii                                                  | 26.01%    | 109 |
| Inapetenta                                               | 2.39%     | 10  |
| Greata/varsaturi                                         | 5.73%     | 24  |
| Scaune diareice                                          | 0.72%     | 3   |
| Cefalee                                                  | 22.91%    | 96  |
| Ameteli                                                  | 6.68%     | 28  |
| Tinitus                                                  | 0.24%     | 1   |
| Vertij                                                   | 3.10%     | 13  |
| Odinofagie                                               | 0.95%     | 4   |
| Tuse                                                     | 0.24%     | 1   |
| Palpitatii                                               | 3.58%     | 15  |
| Cresterea tensiunii arteriale                            | 1.43%     | 6   |
| Adenopatie axilara/ supraclaviculara                     | 8.59%     | 36  |
| Altceva (va rugam precizati)                             | 6.21%     | 26  |
| Total Respondents: 419                                   |           |     |

## Q17 La ce interval dupa cea de a 2-a administrare a vaccinului anti-COVID-19 au aparut reactiile adverse atribuite acestuia?

Answered: 418 Skipped: 91

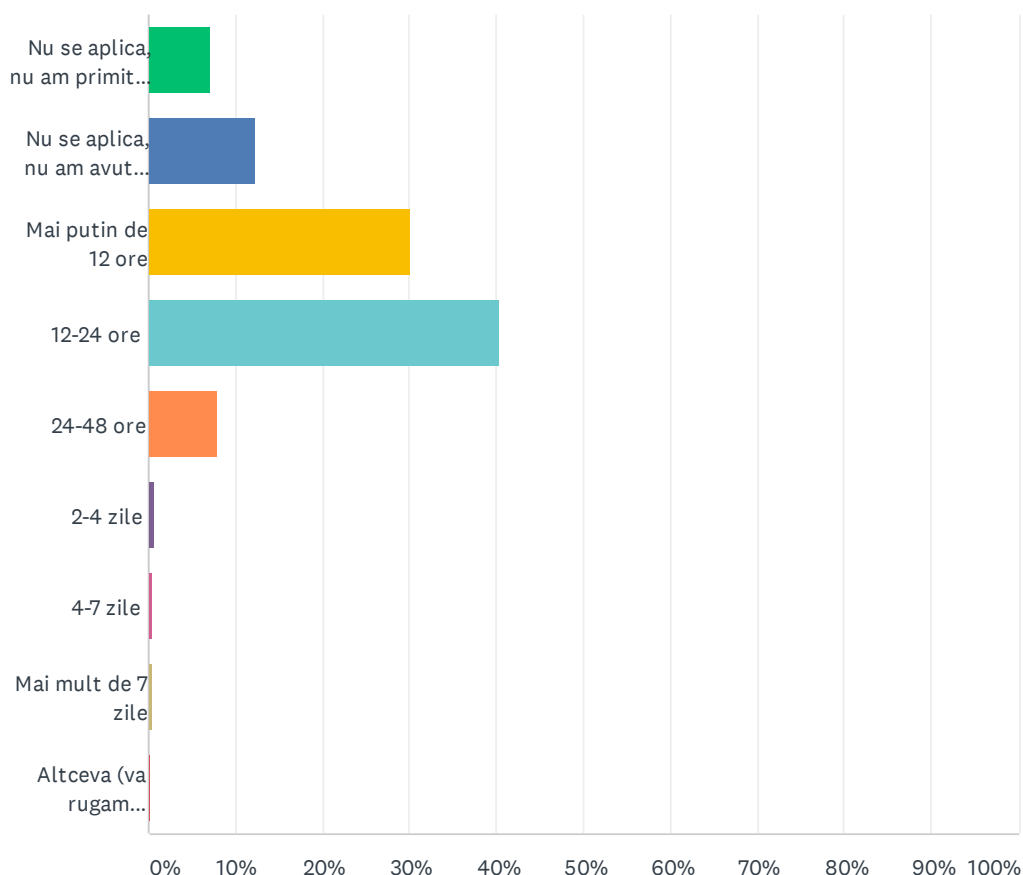

| ANSWER CHOICES                                           | RESPONSES |            |
|----------------------------------------------------------|-----------|------------|
| Nu se aplica, nu am primit inca a doua doza a vaccinului | 7.18%     | 30         |
| Nu se aplica, nu am avut reactii adverse                 | 12.44%    | 52         |
| Mai putin de 12 ore                                      | 30.14%    | 126        |
| 12-24 ore                                                | 40.43%    | 169        |
| 24-48 ore                                                | 7.89%     | 33         |
| 2-4 zile                                                 | 0.72%     | 3          |
| 4-7 zile                                                 | 0.48%     | 2          |
| Mai mult de 7 zile                                       | 0.48%     | 2          |
| Altceva (va rugam precizati)                             | 0.24%     | 1          |
| <b>TOTAL</b>                                             |           | <b>418</b> |



## Q18 Ce durată au avut reacțiile adverse aparute după cea de a 2-a administrare a vaccinului anti-COVID-19 ?

Answered: 415 Skipped: 94

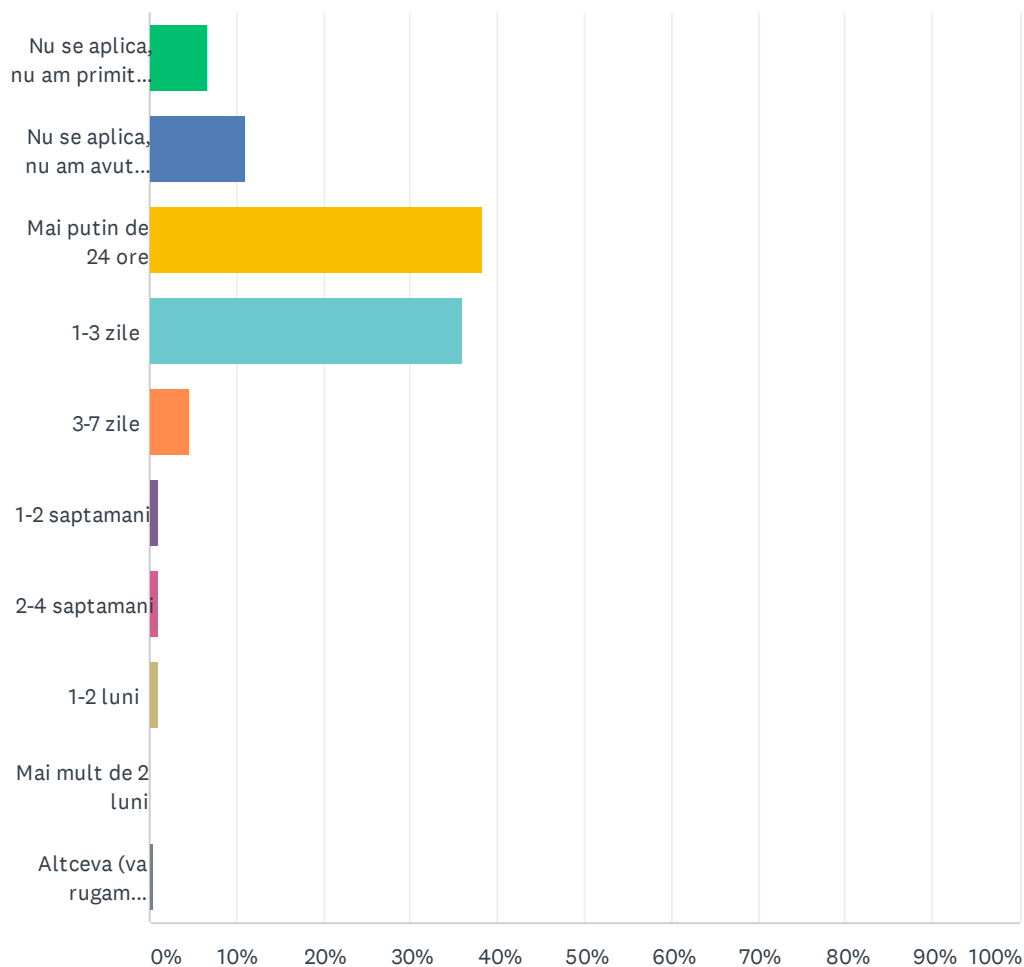

| ANSWER CHOICES                                           | RESPONSES |     |
|----------------------------------------------------------|-----------|-----|
| Nu se aplica, nu am primit inca a doua doza a vaccinului | 6.75%     | 28  |
| Nu se aplica, nu am avut reactii adverse                 | 11.08%    | 46  |
| Mai putin de 24 ore                                      | 38.31%    | 159 |
| 1-3 zile                                                 | 35.90%    | 149 |
| 3-7 zile                                                 | 4.58%     | 19  |
| 1-2 saptamani                                            | 0.96%     | 4   |
| 2-4 saptamani                                            | 0.96%     | 4   |
| 1-2 luni                                                 | 0.96%     | 4   |
| Mai mult de 2 luni                                       | 0.00%     | 0   |
| Altceva (va rugam precizati)                             | 0.48%     | 2   |
| TOTAL                                                    |           | 415 |

## Q19 Ce medicamente ati luat ca tratament pentru reactiile adverse aparute dupa cea de a 2-a administrare a vaccinului anti-COVID-19 ?

Answered: 417 Skipped: 92

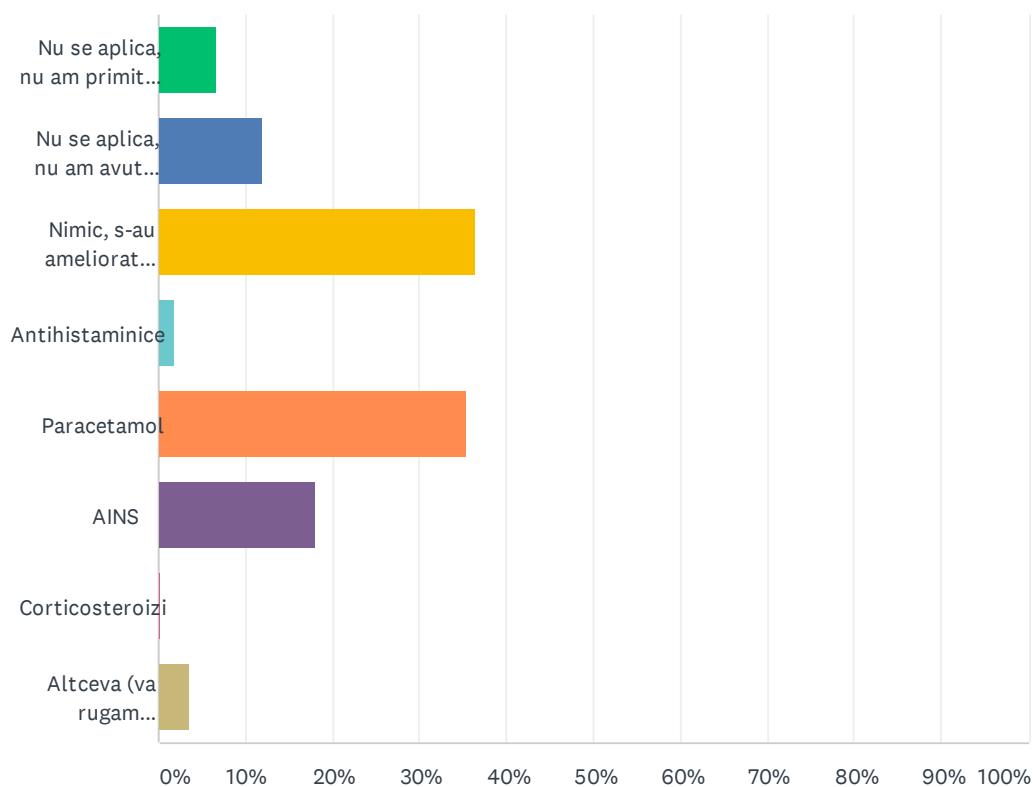

| ANSWER CHOICES                                           | RESPONSES |     |
|----------------------------------------------------------|-----------|-----|
| Nu se aplica, nu am primit inca a doua doza a vaccinului | 6.71%     | 28  |
| Nu se aplica, nu am avut reactii adverse                 | 11.99%    | 50  |
| Nimic, s-au ameliorat spontan                            | 36.45%    | 152 |
| Antihistaminice                                          | 1.92%     | 8   |
| Paracetamol                                              | 35.25%    | 147 |
| AINS                                                     | 17.99%    | 75  |
| Corticosteroizi                                          | 0.24%     | 1   |
| Altceva (va rugam precizati)                             | 3.60%     | 15  |
| Total Respondents: 417                                   |           |     |

## Q20 In cazul in care ati avut reactii adverse secundare vaccinarii anti-COVID-19, ati raportat aceste reactii adverse pe platforma nationala special creata?

Answered: 421 Skipped: 88

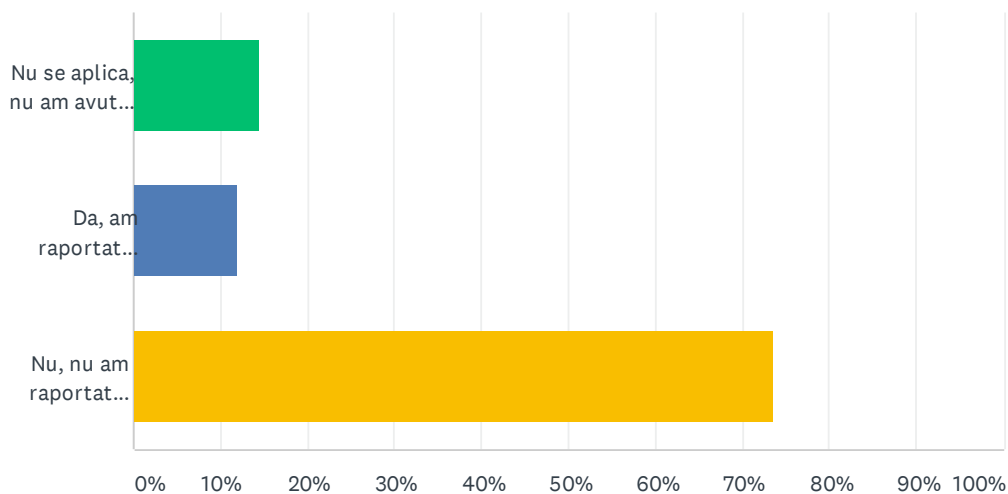

| ANSWER CHOICES                           | RESPONSES |     |
|------------------------------------------|-----------|-----|
| Nu se aplica, nu am avut reactii adverse | 14.49%    | 61  |
| Da, am raportat reactiile adverse        | 11.88%    | 50  |
| Nu, nu am raportat reactiile adverse     | 73.63%    | 310 |
| TOTAL                                    |           | 421 |

## Q21 Credeti ca reactiile adverse aparute in contextul vaccinarii anti-COVID-19 pot necesita eliberarea de concediu medical?

Answered: 421 Skipped: 88

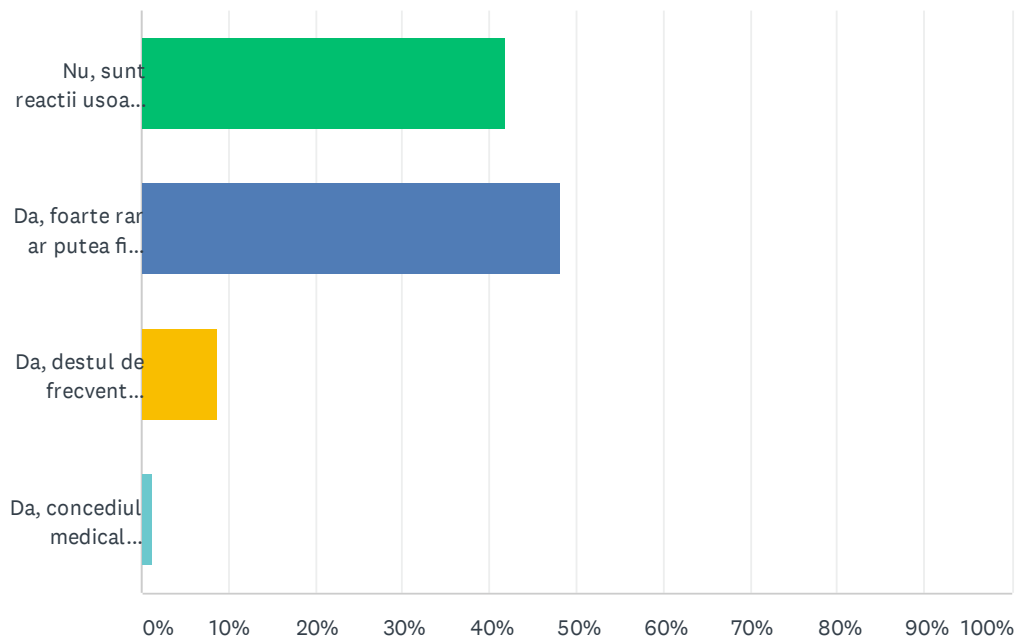

| ANSWER CHOICES                                                                                          | RESPONSES |     |
|---------------------------------------------------------------------------------------------------------|-----------|-----|
| Nu, sunt reactii usoare care nu afecteaza activitatea zilnica                                           | 41.81%    | 176 |
| Da, foarte rar ar putea fi necesara o zi de concediu medical post-vaccinare                             | 48.22%    | 203 |
| Da, destul de frecvent reactiile secundare aparute pot afecta activitatea zilnica pentru mai multe zile | 8.79%     | 37  |
| Da, concediul medical post-vaccinare ar trebui sa fie regula                                            | 1.19%     | 5   |
| TOTAL                                                                                                   |           | 421 |

Q22 Daca ati determinat cantitativ anticorpii neutralizanti anti-spike SARS-CoV-2 dupa al 2-lea rapel al vaccinarii anti-COVID-19, care a fost nivelul acestora, respectiv nivelul maxim in cazul determinarilor multiple? Daca ati determinat de mai multe ori titrul anticorpilor neutralizanti, va rugam sa completati datele pentru determinarea cu titrul maxim observat.

Answered: 419 Skipped: 90

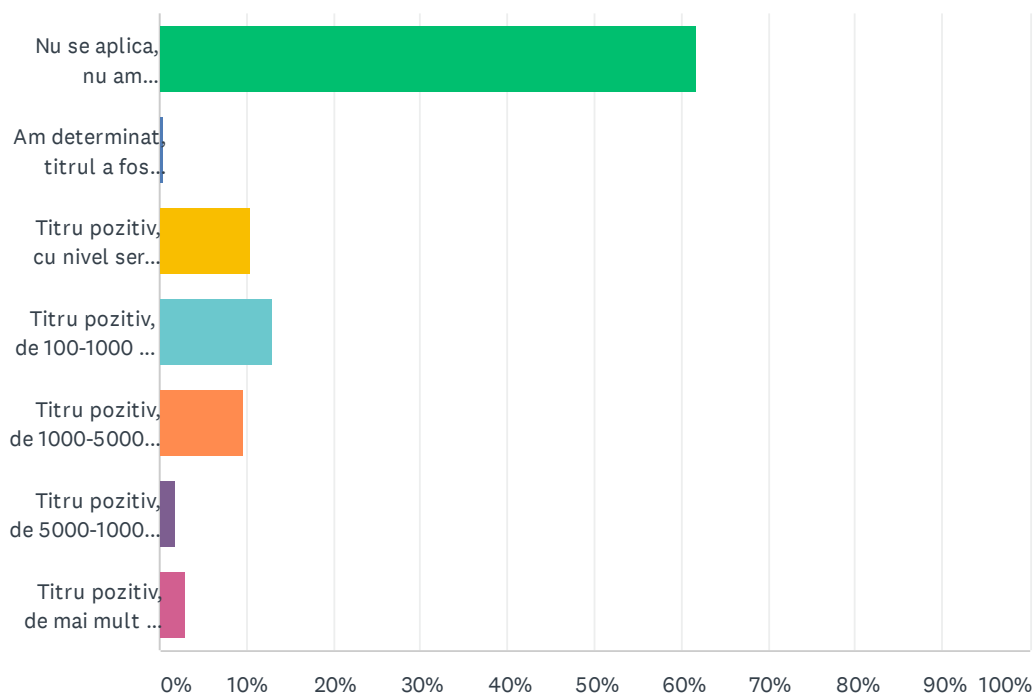

| ANSWER CHOICES                                                                                | RESPONSES |     |
|-----------------------------------------------------------------------------------------------|-----------|-----|
| Nu se aplica, nu am determinat niciodata anticorpii neutralizanti anti-spike SARS-CoV2        | 61.81%    | 259 |
| Am determinat, titrul a fost negativ, sub limita superioara a normalului                      | 0.48%     | 2   |
| Titru pozitiv, cu nivel seric intre 1 si 100 ori limita superioara a normalului               | 10.50%    | 44  |
| Titru pozitiv, de 100-1000 ori mai mare comparativ cu limita superioara a normalului          | 12.89%    | 54  |
| Titru pozitiv, de 1000-5000 ori mai mare comparativ cu limita superioara a normalului         | 9.55%     | 40  |
| Titru pozitiv, de 5000-10000 ori mai mare comparativ cu limita superioara a normalului        | 1.91%     | 8   |
| Titru pozitiv, de mai mult de 10000 ori mai mare comparativ cu limita superioara a normalului | 2.86%     | 12  |
| TOTAL                                                                                         |           | 419 |

## Q23 Daca ati determinat cantitativ anticorpilor neutralizanti anti-spike SARS-CoV-2, la ce interval de timp fata de cel de al 2-lea rapel al vaccinarii anti-COVID-19 a fost determinat titrul declarat mai sus?

Answered: 418 Skipped: 91

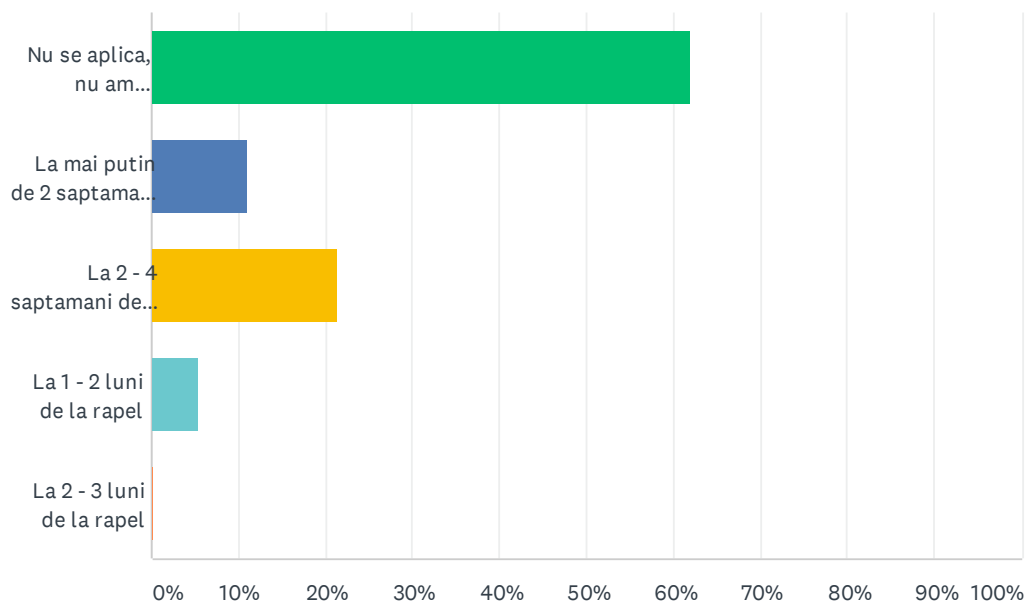

| ANSWER CHOICES                                                                            | RESPONSES |     |
|-------------------------------------------------------------------------------------------|-----------|-----|
| Nu se aplica, nu am determinat niciodata anticorpilor neutralizanti anti-spike SARS-CoV-2 | 61.96%    | 259 |
| La mai puțin de 2 săptămâni de la al 2-lea rapel                                          | 11.00%    | 46  |
| La 2 - 4 săptămâni de la rapel                                                            | 21.29%    | 89  |
| La 1 - 2 luni de la rapel                                                                 | 5.50%     | 23  |
| La 2 - 3 luni de la rapel                                                                 | 0.24%     | 1   |
| TOTAL                                                                                     |           | 418 |

## Q24 Ați fost diagnosticat cu infecție SARS-CoV-2 ?

Answered: 421 Skipped: 88

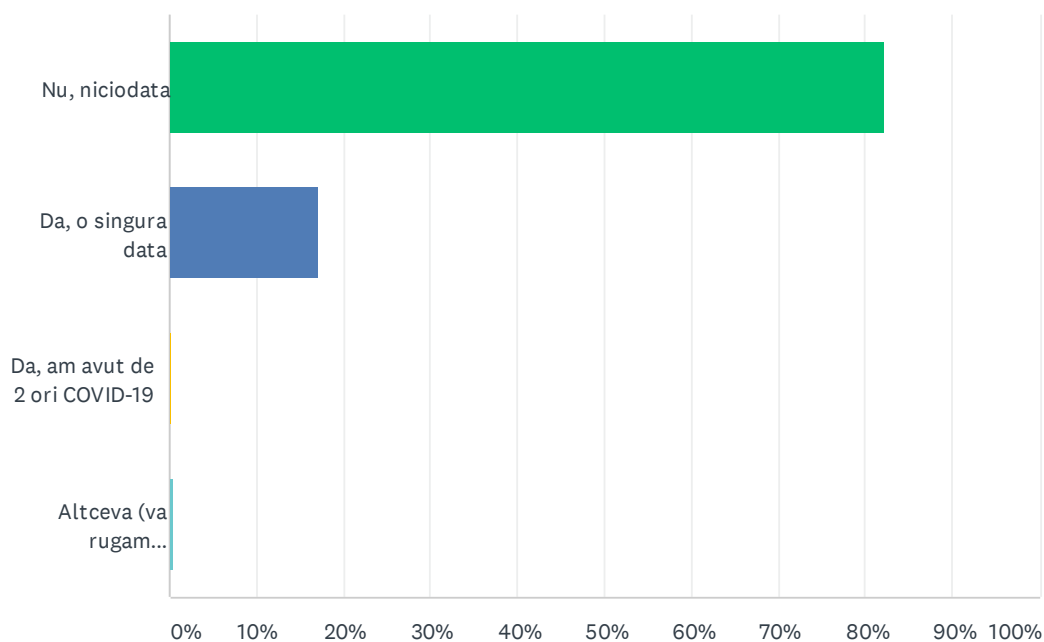

| ANSWER CHOICES                | RESPONSES |     |
|-------------------------------|-----------|-----|
| Nu, niciodata                 | 82.19%    | 346 |
| Da, o singura data            | 17.10%    | 72  |
| Da, am avut de 2 ori COVID-19 | 0.24%     | 1   |
| Altceva (va rugam precizati)  | 0.48%     | 2   |
| TOTAL                         |           | 421 |



## Q25 In ce moment ati fost diagnosticat/a cu COVID-19?

Answered: 72 Skipped: 437

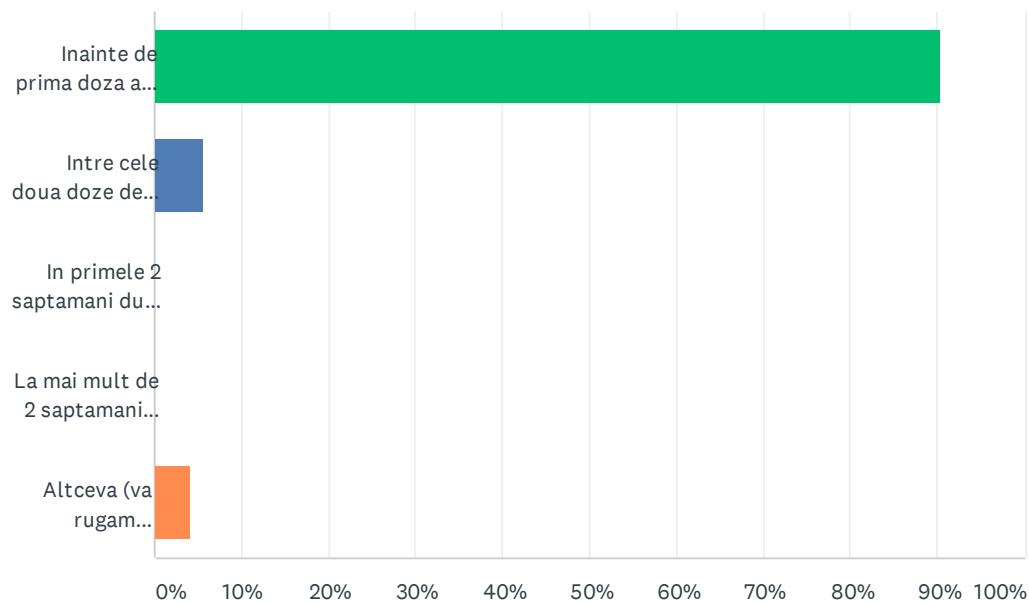

| ANSWER CHOICES                                                         | RESPONSES |    |
|------------------------------------------------------------------------|-----------|----|
| Inainte de prima doza a vaccinarii anti-COVID-19                       | 90.28%    | 65 |
| Intre cele doua doze de vaccinare anti-COVID-19                        | 5.56%     | 4  |
| In primele 2 saptamani dupa a doua doza a vaccinarii anti-COVID-19     | 0.00%     | 0  |
| La mai mult de 2 saptamani dupa a doua doza a vaccinarii anti-COVID-19 | 0.00%     | 0  |
| Altceva (va rugam precizati)                                           | 4.17%     | 3  |
| TOTAL                                                                  |           | 72 |

## Q26 Va rugam sa precizati in ce moment ati fost diagnosticat/a cu COVID-19?

Answered: 73 Skipped: 436

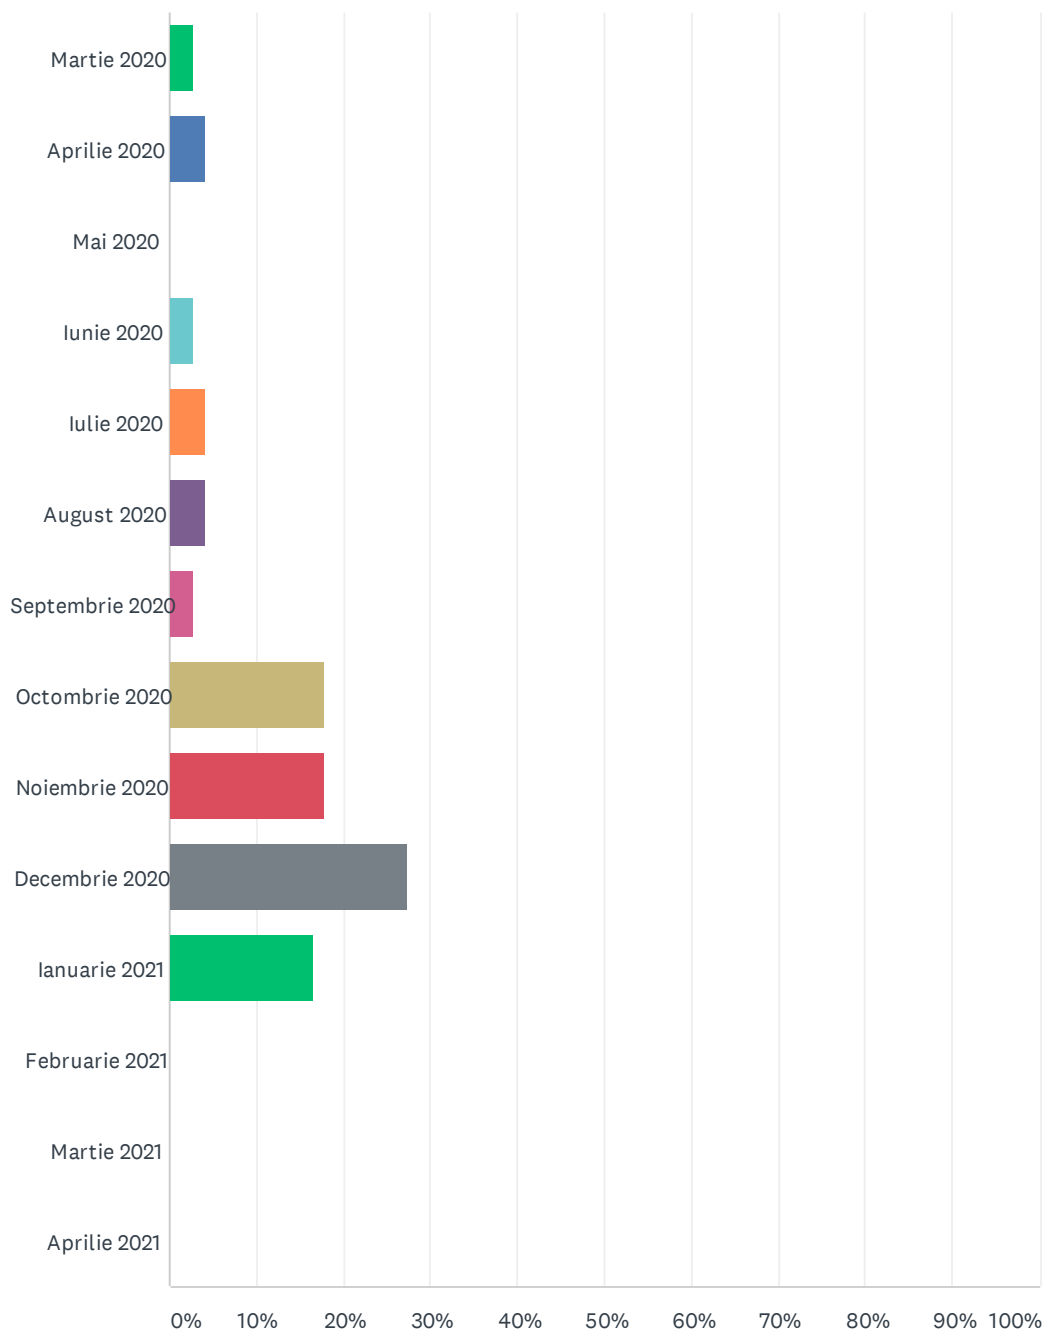

| ANSWER CHOICES  | RESPONSES |    |
|-----------------|-----------|----|
| Martie 2020     | 2.74%     | 2  |
| Aprilie 2020    | 4.11%     | 3  |
| Mai 2020        | 0.00%     | 0  |
| Iunie 2020      | 2.74%     | 2  |
| Iulie 2020      | 4.11%     | 3  |
| August 2020     | 4.11%     | 3  |
| Septembrie 2020 | 2.74%     | 2  |
| Octombrie 2020  | 17.81%    | 13 |
| Noiembrie 2020  | 17.81%    | 13 |
| Decembrie 2020  | 27.40%    | 20 |
| Ianuarie 2021   | 16.44%    | 12 |
| Februarie 2021  | 0.00%     | 0  |
| Martie 2021     | 0.00%     | 0  |
| Aprilie 2021    | 0.00%     | 0  |
| TOTAL           |           | 73 |

## Q27 Daca ati avut infectie SARS-CoV2, ce forma de boala ati avut ?

Answered: 73 Skipped: 436

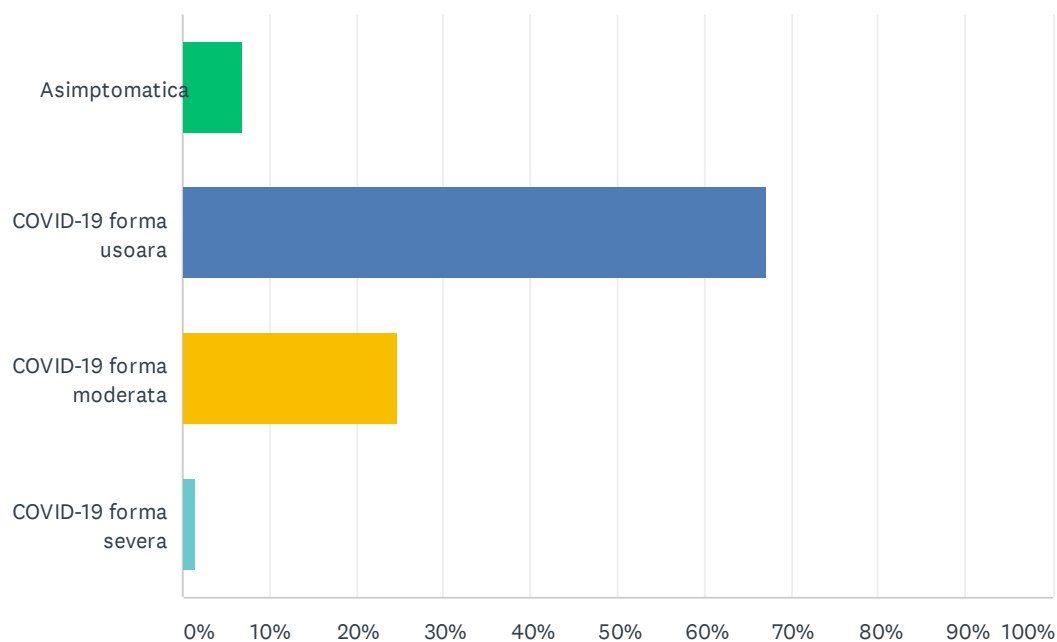

| ANSWER CHOICES          | RESPONSES |    |
|-------------------------|-----------|----|
| Asimptomatica           | 6.85%     | 5  |
| COVID-19 forma usoara   | 67.12%    | 49 |
| COVID-19 forma moderata | 24.66%    | 18 |
| COVID-19 forma severa   | 1.37%     | 1  |
| TOTAL                   |           | 73 |

## Q28 Daca ati avut infectie SARS-CoV-2, ce manifestari ati prezentat? (raspuns multiplu posibil)

Answered: 72 Skipped: 437

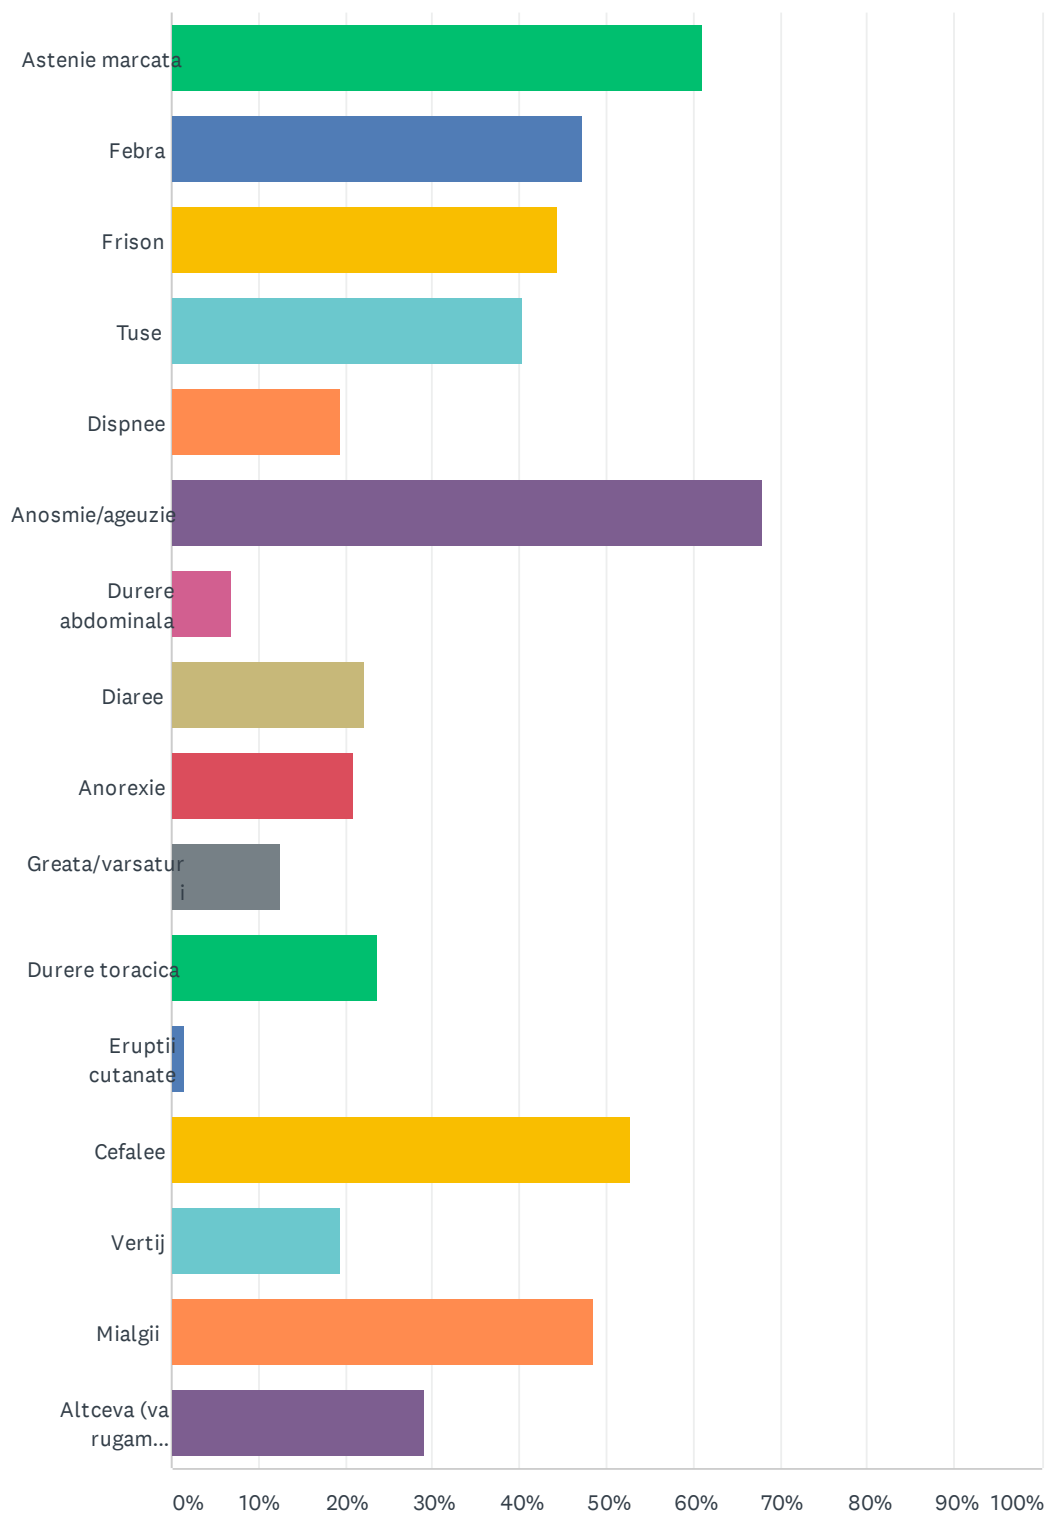

| ANSWER CHOICES               | RESPONSES |    |
|------------------------------|-----------|----|
| Astenie marcata              | 61.11%    | 44 |
| Febra                        | 47.22%    | 34 |
| Frison                       | 44.44%    | 32 |
| Tuse                         | 40.28%    | 29 |
| Dispnee                      | 19.44%    | 14 |
| Anosmie/ageuzie              | 68.06%    | 49 |
| Durere abdominala            | 6.94%     | 5  |
| Diaree                       | 22.22%    | 16 |
| Anorexie                     | 20.83%    | 15 |
| Greata/varsaturi             | 12.50%    | 9  |
| Durere toracica              | 23.61%    | 17 |
| Eruptii cutanate             | 1.39%     | 1  |
| Cefalee                      | 52.78%    | 38 |
| Vertij                       | 19.44%    | 14 |
| Mialgii                      | 48.61%    | 35 |
| Altceva (va rugam precizati) | 29.17%    | 21 |
| Total Respondents: 72        |           |    |

## Q29 Daca ati avut infectie SARS-CoV-2, unde ati fost tratat?

Answered: 73 Skipped: 436

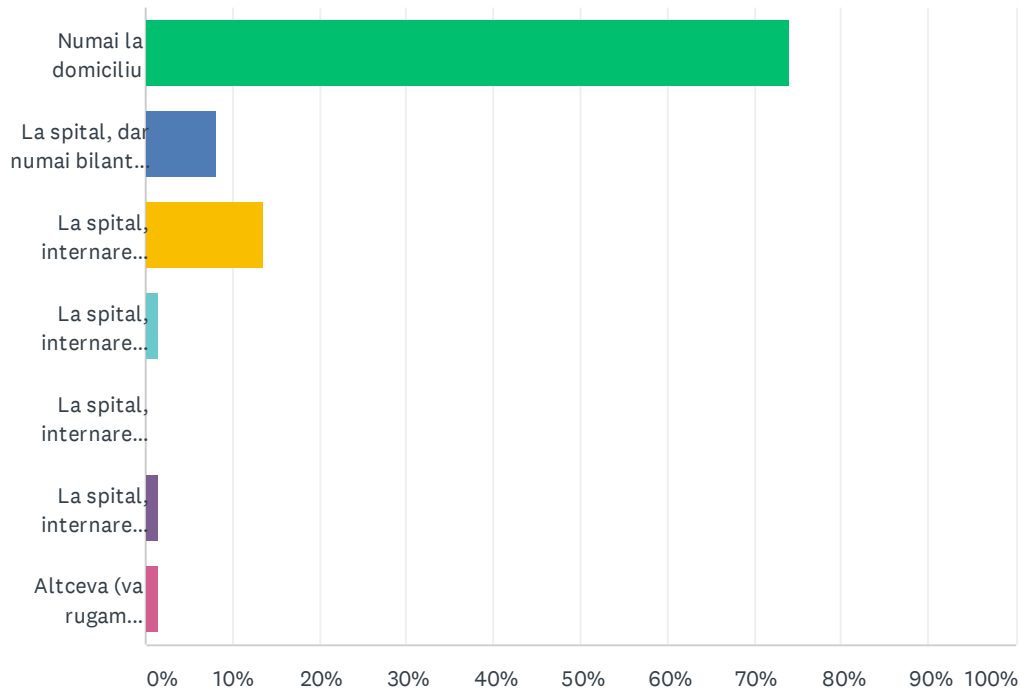

| ANSWER CHOICES                                                                | RESPONSES |    |
|-------------------------------------------------------------------------------|-----------|----|
| Numai la domiciliu                                                            | 73.97%    | 54 |
| La spital, dar numai bilant general, fara internare                           | 8.22%     | 6  |
| La spital, internare continua, nu am necesitat oxigenoterapie                 | 13.70%    | 10 |
| La spital, internare continua, am necesitat oxigenoterapie, dar nu ventilatie | 1.37%     | 1  |
| La spital, internare continua, inclusiv ventilatie non-invaziva               | 0.00%     | 0  |
| La spital, internare continua, inclusiv intubatie                             | 1.37%     | 1  |
| Altceva (va rugam precizati)                                                  | 1.37%     | 1  |
| TOTAL                                                                         |           | 73 |

# Q30 Daca ati avut infectie SARS-CoV2, va rugam sa precizati cu care dintre urmatoarele medicamente ati fost tratat?(raspuns multiplu posibil)

Answered: 73 Skipped: 436

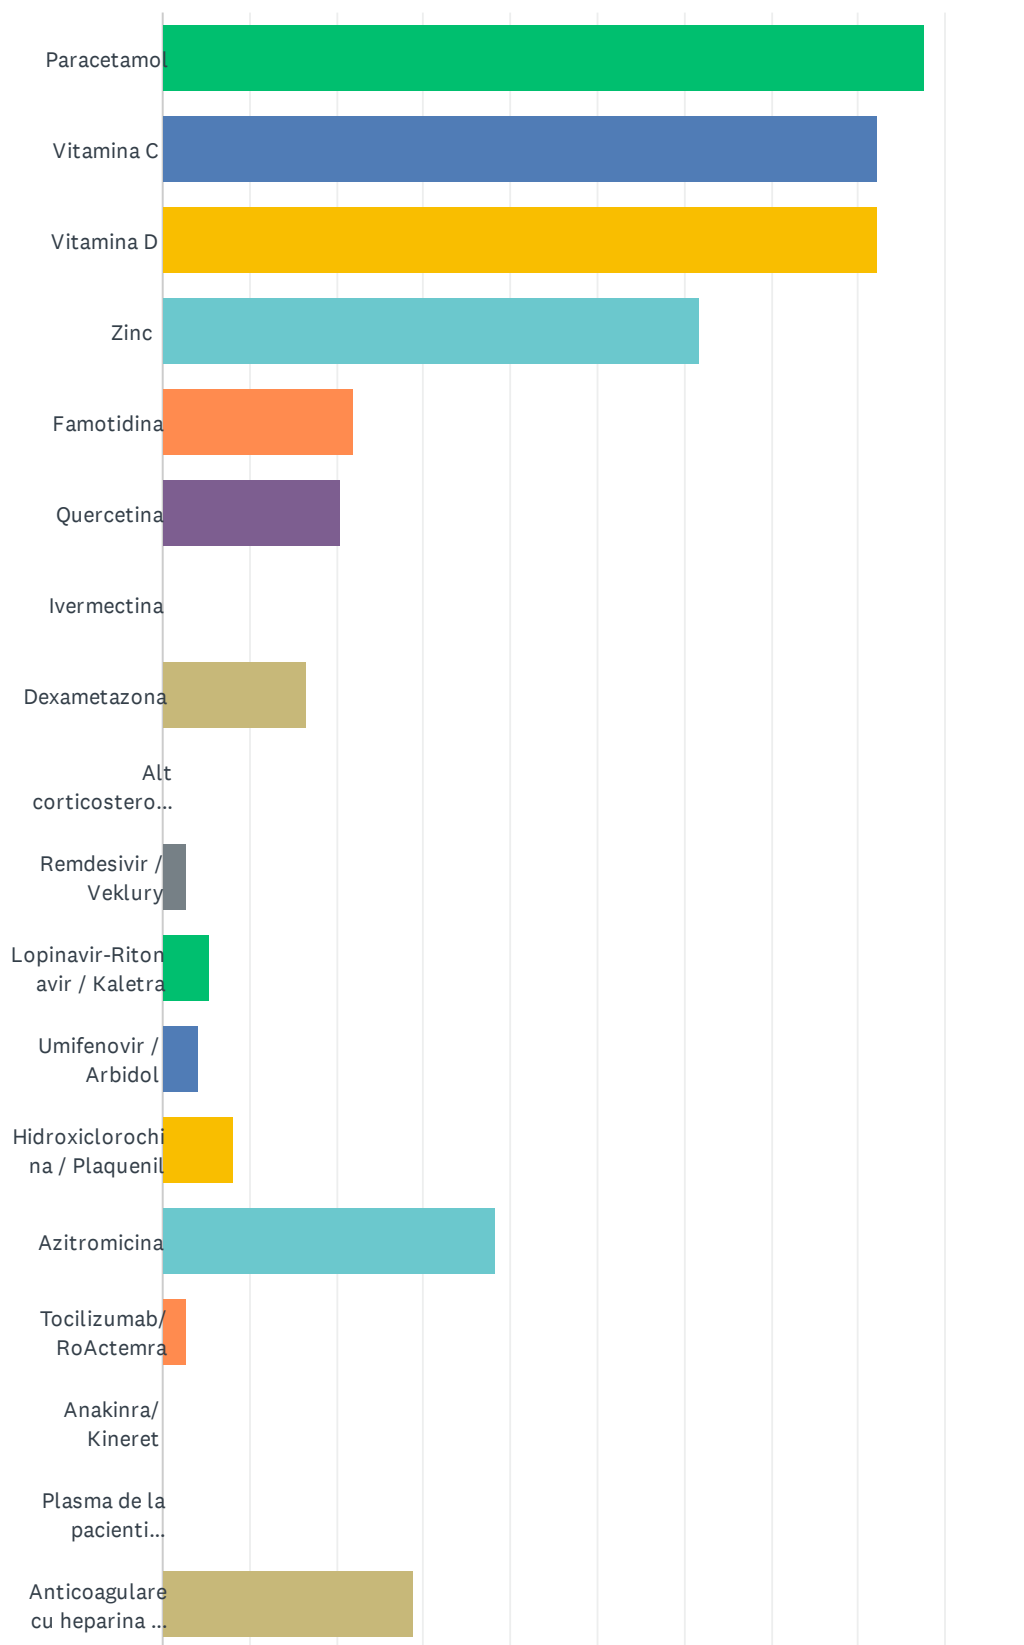



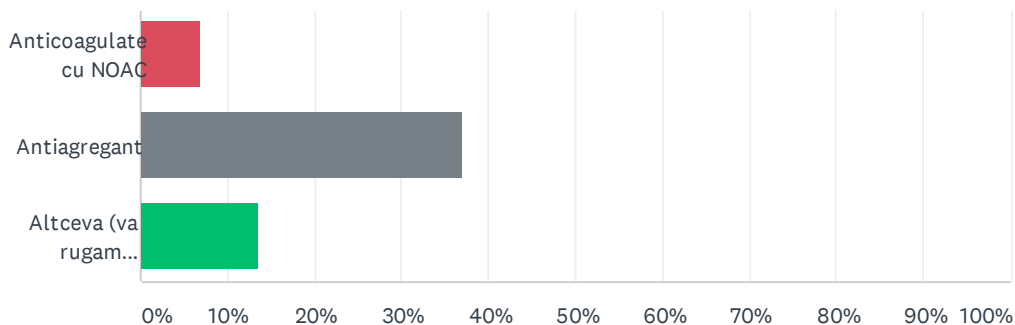

| ANSWER CHOICES                                        | RESPONSES |    |
|-------------------------------------------------------|-----------|----|
| Paracetamol                                           | 87.67%    | 64 |
| Vitamina C                                            | 82.19%    | 60 |
| Vitamina D                                            | 82.19%    | 60 |
| Zinc                                                  | 61.64%    | 45 |
| Famotidina                                            | 21.92%    | 16 |
| Quercetina                                            | 20.55%    | 15 |
| Ivermectina                                           | 0.00%     | 0  |
| Dexametazona                                          | 16.44%    | 12 |
| Alt corticosteroid decat dexametazona                 | 0.00%     | 0  |
| Remdesivir / Veklury                                  | 2.74%     | 2  |
| Lopinavir-Ritonavir / Kaletra                         | 5.48%     | 4  |
| Umifenovir / Arbidol                                  | 4.11%     | 3  |
| Hidroxiclorochina / Plaquenil                         | 8.22%     | 6  |
| Azitromicina                                          | 38.36%    | 28 |
| Tocilizumab/ RoActemra                                | 2.74%     | 2  |
| Anakinra/ Kineret                                     | 0.00%     | 0  |
| Plasma de la pacienti vindecati                       | 0.00%     | 0  |
| Anticoagulare cu heparina cu greutate moleculara mica | 28.77%    | 21 |
| Anticoagulate cu NOAC                                 | 6.85%     | 5  |
| Antiagregant                                          | 36.99%    | 27 |
| Altceva (va rugam precizati)                          | 13.70%    | 10 |
| Total Respondents: 73                                 |           |    |
