# Supplementary material for: Physicians’ Experience with COVID-19 Vaccination: A Survey Study
Source: MDPI journal article supplement (doi:10.3390/healthcare9121746), 2021-12-17
Supplement: s1 [file s1]

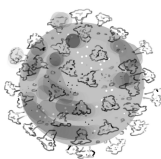

## Experiența vaccinării COVID-19 pentru medicii din România

**Dragi colegi medici,**

Vă mulțumim că ați acceptat invitația noastră de a participa la acest sondaj online dedicat medicilor din România, care evaluează experiența privind vaccinarea COVID-19. Prin acest scurt chestionar online, invităm colegi români din întreaga țară să-și împărtășească anonim experiența vaccinării anti-COVID-19.

Sondajul include 30 întrebări cu o singură alegere sau cu alegere multiplă și completarea lui durează în jur de 5-7 minute.

Participarea la acest sondaj implică acordul de a utiliza răspunsurile pentru a se realiza o analiză a experienței actuale privind vaccinarea COVID-19 în România.

Datele colectate prin intermediul acestui sondaj vor fi procesate sub anonim. Prin completarea acestui chestionar, vă exprimați acordul de a participa voluntar la această cercetare bazată pe întrebări.

Puteți refuza să participați la studiu sau să vă retrageți oricând înainte de a termina sondajul. Rezultatele vor fi prezentate în lucrări cu caracter științific, disponibile inclusiv online.

Cercetarea este derulată de un grup multidisciplinar de medici din UMF Carol Davila, București.

Pentru întrebări, vă rugăm să contactați [physician.survey.covid19@gmail.com](mailto:physician.survey.covid19@gmail.com).

\* 1. Sunteți medic?

☐ Da

☐ Nu

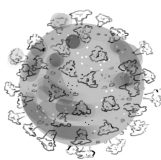

Experiența vaccinării COVID-19 pentru medicii din România

\* 2. Lucrați în România?

☐ Da

☐ Nu

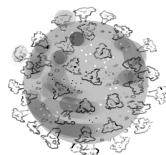

## Experiența vaccinării COVID-19 pentru medicii din România

\* 3. Varsta dumneavoastră este:

☐ 20 – 29 ani

☐ 50 – 59 ani

☐ 30 – 39 ani

☐ 60 – 69 ani

☐ 40 – 49 ani

☐ 70 – 79 ani

\* 4. Care este sexul dumneavoastră?

☐ Masculin

☐ Feminin

\* 5. Care este specialitatea in care activati?

- |                                                      |                                                         |
|------------------------------------------------------|---------------------------------------------------------|
| <input type="radio"/> Anestezie si Terapie Intensiva | <input type="radio"/> Medicina interna                  |
| <input type="radio"/> Boli Infectioase               | <input type="radio"/> Nefrologie                        |
| <input type="radio"/> Cardiologie                    | <input type="radio"/> Neurologie                        |
| <input type="radio"/> Dermatologie                   | <input type="radio"/> Neurochirurgie                    |
| <input type="radio"/> Chirurgie generala             | <input type="radio"/> Oftalmologie                      |
| <input type="radio"/> Chirurgie toracica             | <input type="radio"/> ORL                               |
| <input type="radio"/> Chirurgie vasculara            | <input type="radio"/> Ortopedie/Trauma                  |
| <input type="radio"/> Chirurgie cardiaca             | <input type="radio"/> Pediatrie                         |
| <input type="radio"/> Epidemiologie                  | <input type="radio"/> Pneumologie                       |
| <input type="radio"/> Gastroenterologie              | <input type="radio"/> Reumatologie                      |
| <input type="radio"/> Hematologie                    | <input type="radio"/> Radiologie si Imagistica Medicala |
| <input type="radio"/> Medicina de Familie            | <input type="radio"/> Urologie                          |
| <input type="radio"/> Medicina de Urgenta            |                                                         |
| <input type="radio"/> Alteva (va rugam mentionati)   |                                                         |

\* 6. Care este nivelul dumneavoastra de experienta?

- |                                        |                                              |
|----------------------------------------|----------------------------------------------|
| <input type="radio"/> Medic rezident   | <input type="radio"/> Sef de sectie/Profesor |
| <input type="radio"/> Medic specialist | <input type="radio"/> Medic pensionar        |
| <input type="radio"/> Medic primar     |                                              |

\* 7. Va rugam sa precizati cu care dintre urmatoarele comorbiditati ati fost diagnosticat/a:  
(raspuns multiplu posibil)

- |                                                                      |                                                 |
|----------------------------------------------------------------------|-------------------------------------------------|
| <input type="checkbox"/> Nu am patologii semnificative diagnosticate | <input type="checkbox"/> Diabet zaharat         |
| <input type="checkbox"/> Hipertensiune arteriala                     | <input type="checkbox"/> Boala hepatica cronica |
| <input type="checkbox"/> Insuficienta cardiaca                       | <input type="checkbox"/> Boala autoimuna        |
| <input type="checkbox"/> Insuficienta respiratorie                   | <input type="checkbox"/> Neoplazie              |
| <input type="checkbox"/> Boala renala cronica fara dializa           | <input type="checkbox"/> Obezitate              |
| <input type="checkbox"/> Dializa renala                              | <input type="checkbox"/> Alergii                |
| <input type="checkbox"/> Altceva (va rugam precizati)                |                                                 |

\* 8. Vi s-a administrat vaccinul anti-COVID-19?

- ☐ Da, ambele doze
- ☐ Da, doar prima doza
- ☐ Nu

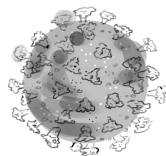

### Experiența vaccinării COVID-19 pentru medicii din România

\* 9. Dacă NU v-ați vaccinat împotriva COVID-19, care este motivul?

- ☐ Istoric de alergii
- ☐ Istoric de soc anafilactic
- ☐ Am avut COVID-19 recent
- ☐ Nu cred în utilitatea vaccinului
- ☐ Altceva (va rugăm precizați)

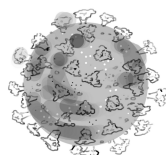

### Experiența vaccinării COVID-19 pentru medicii din România

\* 10. Cu ce vaccin anti-COVID-19 ați fost vaccinat/a?

- ☐ Pfizer - BioNTech (Comirnaty) - BNT162b2
- ☐ Moderna – mRNA-1273
- ☐ AstraZeneca/ Oxford – AZD1222
- ☐ Altceva (va rugăm precizați)

\* 11. Cand ati fost vaccinat/a impotriva COVID-19 (prima doza)?

☐ Decembrie 2020

☐ Martie 2021

☐ Ianuarie 2021

☐ Aprilie 2021

☐ Februarie 2021

\* 12. Inainte de administrarea vaccinului anti-COVID-19 +/- inaintea aparitiei oricarei reactii adverse, ati luat vreun tratament pentru a preveni eventualele reactii adverse secundare vaccinarii? (raspuns multiplu posibil)

☐ Nu, nu am luat niciun medicament

☐ Da, antihistaminic

☐ Da, paracetamol

☐ Da, AINS

☐ Da, altceva (va rugam precizati)

\* 13. Dupa administrarea primei doze a vaccinului anti-COVID-19 ce reactii adverse ati prezentat?

(raspuns multiplu posibil)

☐ Nu am avut nicio reactie adversa

☐ Inapetenta

☐ Modificari cutanate la locul de injectare

☐ Greaata/ varsaturi

☐ Durere la locul de injectare

☐ Scaune diareice

☐ Reactie alergica usoara-moderata

☐ Cefalee

☐ Reactie alergica severa

☐ Ameteli

☐ Eruptii cutanate

☐ Tinitus

☐ Astenie marcata

☐ Vertij

☐ Somnolenta

☐ Odinofagie

☐ Insomnie

☐ Tuse

☐ Subfebrilitate

☐ Palpitatii

☐ Sindrom febril

☐ Cresterea tensiunii arteriale

☐ Frison

☐ Adenopatie axilara/supraclaviculara

☐ Mialgii

☐ Altceva (va rugam precizati)

\* 14. La ce interval dupa prima adminstrare a vaccinului anti-COVID-19 au aparut reactiile adverse atribuite acestuia?

- ☐ Nu se aplica, nu am avut reactii adverse
- ☐ Mai putin de 24 ore
- ☐ 1-2 zile
- ☐ 2-4 zile
- ☐ 4-7 zile
- ☐ 1-2 saptamani
- ☐ Altceva (va rugam precizati)

\* 15. Ce medicamente ati luat ca tratament pentru a trata reactiile adverse aparute dupa prima administrare a vaccinului anti-COVID-19? (raspuns multiplu posibil)

- ☐ Nu se aplica, nu am avut reactii adverse
- ☐ Nimic, s-au ameliorat spontan
- ☐ Antihistaminice
- ☐ Paracetamol
- ☐ AINS
- ☐ Corticosteroizi
- ☐ Altceva (va rugam precizati)

\* 16. După administrarea celei de a 2-a doze a vaccinului anti-COVID-19 ce reacții adverse ați prezentat?

(răspuns multiplu posibil)

- |                                                                                   |                                                               |
|-----------------------------------------------------------------------------------|---------------------------------------------------------------|
| <input type="checkbox"/> Nu se aplică, nu am primit încă a doua doză a vaccinului | <input type="checkbox"/> Mialgii                              |
| <input type="checkbox"/> Nu am avut nicio reacție adversă                         | <input type="checkbox"/> Inapetență                           |
| <input type="checkbox"/> Modificări cutanate la locul de injectare                | <input type="checkbox"/> Greață/vărsături                     |
| <input type="checkbox"/> Durere la locul de injectare                             | <input type="checkbox"/> Scaune diareice                      |
| <input type="checkbox"/> Reacție alergică ușoară-moderată                         | <input type="checkbox"/> Cefalee                              |
| <input type="checkbox"/> Reacție alergică severă                                  | <input type="checkbox"/> Ameteli                              |
| <input type="checkbox"/> Eruptii cutanate                                         | <input type="checkbox"/> Tinitus                              |
| <input type="checkbox"/> Astenie marcată                                          | <input type="checkbox"/> Vertij                               |
| <input type="checkbox"/> Somnolență                                               | <input type="checkbox"/> Odinofagie                           |
| <input type="checkbox"/> Insomnie                                                 | <input type="checkbox"/> Tuse                                 |
| <input type="checkbox"/> Subfebrilitate                                           | <input type="checkbox"/> Palpitații                           |
| <input type="checkbox"/> Sindrom febril                                           | <input type="checkbox"/> Creșterea tensiunii arteriale        |
| <input type="checkbox"/> Frison                                                   | <input type="checkbox"/> Adenopatie axilară/ supraclaviculară |
| <input type="checkbox"/> Altceva (va rugăm precizați)                             |                                                               |

\* 17. La ce interval după cea de a 2-a administrare a vaccinului anti-COVID-19 au apărut reacțiile adverse atribuite acestuia?

- ☐ Nu se aplică, nu am primit încă a doua doză a vaccinului
- ☐ Nu se aplică, nu am avut reacții adverse
- ☐ Mai puțin de 12 ore
- ☐ 12-24 ore
- ☐ 24-48 ore
- ☐ 2-4 zile
- ☐ 4-7 zile
- ☐ Mai mult de 7 zile
- ☐ Altceva (va rugăm precizați)

\* 18. Ce durata au avut reactiile adverse aparute dupa cea de a 2-a adminstrare a vaccinului anti-COVID-19 ?

- ☐ Nu se aplica, nu am primit inca a doua doza a vaccinului
- ☐ Nu se aplica, nu am avut reactii adverse
- ☐ Mai putin de 24 ore
- ☐ 1-3 zile
- ☐ 3-7 zile
- ☐ 1-2 saptamani
- ☐ 2-4 saptamani
- ☐ 1-2 luni
- ☐ Mai mult de 2 luni
- ☐ Altceva (va rugam precizati)

\* 19. Ce medicamente ati luat ca tratament pentru reactiile adverse aparute dupa cea de a 2-a administrare a vaccinului anti-COVID-19 ?

- ☐ Nu se aplica, nu am primit inca a doua doza a vaccinului
- ☐ Nu se aplica, nu am avut reactii adverse
- ☐ Nimic, s-au ameliorat spontan
- ☐ Antihistaminice
- ☐ Paracetamol
- ☐ AINS
- ☐ Corticosteroizi
- ☐ Altceva (va rugam precizati)

\* 20. In cazul in care ati avut reactii adverse secundare vaccinarii anti-COVID-19, ati raportat aceste reactii adverse pe platforma nationala special creata?

- ☐ Nu se aplica, nu am avut reactii adverse
- ☐ Da, am raportat reactiile adverse
- ☐ Nu, nu am raportat reactiile adverse



\* 21. Credeti ca reactiile adverse aparute in contextul vaccinarii anti-COVID-19 pot necesita eliberarea de concediu medical?

- ☐ Nu, sunt reactii usoare care nu afecteaza activitatea zilnica
- ☐ Da, foarte rar ar putea fi necesara o zi de concediu medical post-vaccinare
- ☐ Da, destul de frecvent reactiile secundare aparute pot afecta activitatea zilnica pentru mai multe zile
- ☐ Da, concediul medical post-vaccinare ar trebui sa fie regula

\* 22. Daca ati determinat cantitativ anticorpilor neutralizanti anti-spike SARS-CoV-2 dupa al 2-lea rapel al vaccinarii anti-COVID-19, care a fost nivelul acestora, respectiv nivelul maxim in cazul determinarilor multiple?

Daca ati determinat de mai multe ori titrul anticorpilor neutralizanti, va rugam sa completati datele pentru determinarea cu titrul maxim observat.

- ☐ Nu se aplica, nu am determinat niciodata anticorpilor neutralizanti anti-spike SARS-CoV2
- ☐ Am determinat, titrul a fost negativ, sub limita superioara a normalului
- ☐ Titru pozitiv, cu nivel seric intre 1 si 100 ori limita superioara a normalului
- ☐ Titru pozitiv, de 100-1000 ori mai mare comparativ cu limita superioara a normalului
- ☐ Titru pozitiv, de 1000-5000 ori mai mare comparativ cu limita superioara a normalului
- ☐ Titru pozitiv, de 5000-10000 ori mai mare comparativ cu limita superioara a normalului
- ☐ Titru pozitiv, de mai mult de 10000 ori mai mare comparativ cu limita superioara a normalului

\* 23. Daca ati determinat cantitativ anticorpilor neutralizanti anti-spike SARS-CoV-2, la ce interval de timp fata de cel de al 2-lea rapel al vaccinarii anti-COVID-19 a fost determinat titrul declarat mai sus?

- ☐ Nu se aplica, nu am determinat niciodata anticorpilor neutralizanti anti-spike SARS-CoV-2
- ☐ La mai putin de 2 saptamani de la al 2-lea rapel
- ☐ La 2 - 4 saptamani de la rapel
- ☐ La 1 - 2 luni de la rapel
- ☐ La 2 - 3 luni de la rapel

\* 24. Ati fost diagnosticat cu infectie SARS-CoV-2 ?

- ☐ Nu, niciodata
- ☐ Da, o singura data
- ☐ Da, am avut de 2 ori COVID-19
- ☐ Altceva (va rugam precizati)

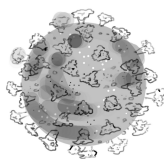

## Experiența vaccinării COVID-19 pentru medicii din România

\* 25. In ce moment ati fost diagnosticat/a cu COVID-19?

- ☐ Inainte de prima doza a vaccinarii anti-COVID-19
- ☐ Intre cele doua doze de vaccinare anti-COVID-19
- ☐ In primele 2 saptamani dupa a doua doza a vaccinarii anti-COVID-19
- ☐ La mai mult de 2 saptamani dupa a doua doza a vaccinarii anti-COVID-19
- ☐ Altceva (va rugam precizati)

\* 26. Va rugam sa precizati in ce moment ati fost diagnosticat/a cu COVID-19?

- |                                       |                                      |
|---------------------------------------|--------------------------------------|
| <input type="radio"/> Martie 2020     | <input type="radio"/> Octombrie 2020 |
| <input type="radio"/> Aprilie 2020    | <input type="radio"/> Noiembrie 2020 |
| <input type="radio"/> Mai 2020        | <input type="radio"/> Decembrie 2020 |
| <input type="radio"/> Iunie 2020      | <input type="radio"/> Ianuarie 2021  |
| <input type="radio"/> Iulie 2020      | <input type="radio"/> Februarie 2021 |
| <input type="radio"/> August 2020     | <input type="radio"/> Martie 2021    |
| <input type="radio"/> Septembrie 2020 | <input type="radio"/> Aprilie 2021   |

\* 27. Daca ati avut infectie SARS-CoV2, ce forma de boala ati avut ?

- ☐ Asimptomatica
- ☐ COVID-19 forma usoara
- ☐ COVID-19 forma moderata
- ☐ COVID-19 forma severa

\* 28. Daca ati avut infectie SARS-CoV-2, ce manifestari ati prezentat?

(raspuns multiplu posibil)

- |                                                       |                                            |
|-------------------------------------------------------|--------------------------------------------|
| <input type="checkbox"/> Astenie marcata              | <input type="checkbox"/> Anorexie          |
| <input type="checkbox"/> Febra                        | <input type="checkbox"/> Greaata/varsaturi |
| <input type="checkbox"/> Frison                       | <input type="checkbox"/> Durere toracica   |
| <input type="checkbox"/> Tuse                         | <input type="checkbox"/> Eruptii cutanate  |
| <input type="checkbox"/> Dispnee                      | <input type="checkbox"/> Cefalee           |
| <input type="checkbox"/> Anosmie/ageuzie              | <input type="checkbox"/> Vertij            |
| <input type="checkbox"/> Durere abdominala            | <input type="checkbox"/> Mialgii           |
| <input type="checkbox"/> Diaree                       |                                            |
| <input type="checkbox"/> Altceva (va rugam precizati) |                                            |

\* 29. Daca ati avut infectie SARS-CoV-2, unde ati fost tratat?

- |                                                                                     |                                                                                                     |
|-------------------------------------------------------------------------------------|-----------------------------------------------------------------------------------------------------|
| <input type="radio"/> Numai la domiciliu                                            | <input type="radio"/> La spital, internare continua, am necesitat oxigenoterapie, dar nu ventilatie |
| <input type="radio"/> La spital, dar numai bilant general, fara internare           | <input type="radio"/> La spital, internare continua, inclusiv ventilatie non-invaziva               |
| <input type="radio"/> La spital, internare continua, nu am necesitat oxigenoterapie | <input type="radio"/> La spital, internare continua, inclusiv intubatie                             |
| <input type="radio"/> Altceva (va rugam precizati)                                  |                                                                                                     |

\* 30. Daca ati avut infectie SARS-CoV2, va rugam sa precizati cu care dintre urmatoarele medicamente ati fost tratat?

(raspuns multiplu posibil)

- |                                                                |                                                                                |
|----------------------------------------------------------------|--------------------------------------------------------------------------------|
| <input type="checkbox"/> Paracetamol                           | <input type="checkbox"/> Lopinavir-Ritonavir / Kaletra                         |
| <input type="checkbox"/> Vitamina C                            | <input type="checkbox"/> Umifenovir / Arbidol                                  |
| <input type="checkbox"/> Vitamina D                            | <input type="checkbox"/> Hidroxiclorochina / Plaquenil                         |
| <input type="checkbox"/> Zinc                                  | <input type="checkbox"/> Azitromicina                                          |
| <input type="checkbox"/> Famotidina                            | <input type="checkbox"/> Tocilizumab/ RoActemra                                |
| <input type="checkbox"/> Quercetina                            | <input type="checkbox"/> Anakinra/ Kineret                                     |
| <input type="checkbox"/> Ivermectina                           | <input type="checkbox"/> Plasma de la pacienti vindecati                       |
| <input type="checkbox"/> Dexametazona                          | <input type="checkbox"/> Anticoagulare cu heparina cu greutate moleculara mica |
| <input type="checkbox"/> Alt corticosteroid decat dexametazona | <input type="checkbox"/> Anticoagulate cu NOAC                                 |
| <input type="checkbox"/> Remdesivir / Veklury                  | <input type="checkbox"/> Antiagregant                                          |
| <input type="checkbox"/> Altceva (va rugam precizati)          |                                                                                |
